# Supplementary material for: Genetic Predictors of Response to Serotonergic and Noradrenergic Antidepressants in Major Depressive Disorder: A Genome-Wide Analysis of Individual-Level Data and a Meta-Analysis
Source: PubMed Central journal article supplement (PMC3472989; doi:10.1371/journal.pmed.1001326), 2012-10-16
Supplement: pmed.1001326.s001.pdf [file pmed.1001326.s001.pdf]

# Genetic Predictors of Response to Serotonergic and Noradrenergic Antidepressants in Major Depressive Disorder: a NEWMEDS consortium report

## Supplementary Materials

### Table of Contents:

|       |                                                                             |    |
|-------|-----------------------------------------------------------------------------|----|
| 1     | NEWMEDS materials and methods .....                                         | 2  |
| 1.1   | Individual Sample Information .....                                         | 2  |
| 1.1.1 | GENDEP .....                                                                | 2  |
| 1.1.2 | GenPod.....                                                                 | 3  |
| 1.1.3 | GODS.....                                                                   | 4  |
| 1.1.4 | Pfizer .....                                                                | 4  |
| 1.1.5 | Glaxo Smith Kline .....                                                     | 5  |
| 1.2   | Quality control .....                                                       | 7  |
| 1.3   | Definition of antidepressant response phenotype .....                       | 8  |
| 1.4   | Power analysis .....                                                        | 10 |
| 2     | Suggestive results from the whole genome analyses in NEWMEDS.....           | 11 |
| 2.1   | Response to any antidepressant .....                                        | 11 |
| 2.2   | Response to Serotonergic Antidepressants .....                              | 11 |
| 2.3   | Response to Noradrenergic Antidepressants .....                             | 12 |
| 2.4   | Differential response to serotonergic and noradrenergic antidepressants.... | 13 |
| 3     | Pathway Analysis in NEWMEDS .....                                           | 15 |
| 3.1   | Methods.....                                                                | 15 |
| 3.2   | Results.....                                                                | 16 |
| 4     | Meta-analysis with STAR*D .....                                             | 17 |
| 4.1   | Materials and Methods.....                                                  | 17 |
| 4.1.1 | STAR*D .....                                                                | 17 |
| 4.2   | Imputation .....                                                            | 19 |
| 4.3   | Analysis.....                                                               | 20 |
| 4.4   | Results.....                                                                | 20 |
| 4.4.1 | Any Antidepressant.....                                                     | 20 |
| 4.4.2 | Serotonergic Antidepressants.....                                           | 22 |
| 5     | Polygene scoring .....                                                      | 24 |
| 5.1   | Method .....                                                                | 24 |
| 5.2   | Results.....                                                                | 25 |
| 5.2.1 | Any Antidepressant.....                                                     | 25 |
| 5.2.2 | Serotonergic Antidepressant .....                                           | 25 |
| 6     | Study level meta-analysis between the samples in NEWMEDS .....              | 26 |
| 6.1   | Individual study results (QQ plots).....                                    | 26 |
| 6.2   | Study level meta-analysis method .....                                      | 29 |
| 6.3   | Results.....                                                                | 29 |
| 6.3.1 | Study level meta-analysis of response to any antidepressant (n=1790) .....  | 29 |
| 6.3.2 | Study level meta-analysis of response to SRIs (n=1222) .....                | 34 |
| 6.3.3 | Study level meta-analysis of response to NRIs (n=568).....                  | 38 |
| 7     | Candidate gene analysis in NEWMEDS.....                                     | 42 |
| 7.1   | Exploration of candidate genes .....                                        | 42 |
| 7.2   | Results.....                                                                | 42 |
| 8     | Imputation results from NEWMEDS.....                                        | 58 |
| 9     | References:.....                                                            | 67 |

## **1 NEWMEDS materials and methods**

### **1.1 Individual Sample Information**

#### **1.1.1 GENDEP**

A detailed description of the Genome-Based Therapeutic Drugs for Depression (GENDEP) sample and design is available elsewhere [1]. Briefly, GENDEP was a twelve-week open-label part-randomized multi-centre study with two active pharmacological treatment arms [1]. This includes 57 additionally recruited participants which were not subjects to previous reports. This enlarged GENDEP sample includes 868 treatment-seeking adults (men n=321; women n=547) diagnosed with ICD-10/DSM-IV unipolar major depression of at least moderate severity established in the Schedules for Clinical Assessment in Neuropsychiatry (SCAN) interview [2]. Severity of depression was assessed weekly by three established rating scales [3]. Personal or family history of bipolar disorder or schizophrenia and active substance dependence constituted exclusion criteria. Individuals were of white European origin and ranged from 19 to 72 years of age with a mean age of 42.6 years (S.D=11.7). Eligible participants were treated with either escitalopram or nortriptyline. These two drugs represent different mechanisms of antidepressant action with escitalopram primarily affecting serotonergic neurotransmission and nortriptyline primarily affecting noradrenergic neurotransmission [4,5]. Patients with no contraindications were randomly allocated to flexible-dosage nortriptyline (50–150 mg daily) or escitalopram (10–30 mg daily) for 12 weeks. Patients with contraindications for one drug were offered the other. A total of 628 participants (77%) completed at least 8 weeks of treatment with the originally allocated antidepressant [1]. Individuals were excluded from the analysis if they had no post baseline information. The study was approved by ethics boards in all participating

centres. All participants provided a written consent after the procedures were explained. GENDEP is registered at EudraCT (No.2004-001723-38, <http://eudract.emea.europa.eu>) and ISRCTN (No. 03693000, <http://www.controlled-trials.com>).

### **1.1.2 GenPod**

A full description of the methodology and sample of the GENetic and clinical Predictors Of treatment response in Depression (GenPod) study can be found elsewhere [6]. The study was a multi-centre randomized clinical trial of 601 patients with depression (men n=161 women n=347) recruited in primary care who had an ICD-10 diagnosis of major depression of at least moderate severity as assessed by the Clinical Interview Schedule-Revised (CIS-R) [7] and the Beck Depression Inventory (BDI) [8]. Individuals were randomly allocated to either reboxetine (4mg twice daily) or citalopram (20mg). These two drugs represent different mechanisms of antidepressant action with citalopram primarily affecting serotonergic neurotransmission and reboxetine primarily affecting noradrenergic neurotransmission. As ethnicity is a major confounder in genetic studies due to the introduction of LD and haplotypic difference across ethnic backgrounds, only individuals with a white European ancestry were chosen for the whole genome analysis (n=512). Individuals were aged between 18-74 years with a mean age of 38.8 years. Exclusion criteria included if individuals had psychosis, bipolar disorder or major substance or alcohol abuse, or if they had medical contraindications. Individuals were further excluded from the analysis if they had no post baseline information. All participants provided written consent after the study and procedure were explained. Ethical approval was obtained from the South West Ethics Committee (MREC 02/6/076) as well as research governance approval from Bristol,

Manchester and Newcastle Primary Care NHS Trusts. The ISRCTN is 31345163 and EudraCT number 2004-001434-16.

### **1.1.3 GODS**

The Geneva Outpatient Depression Study (GODS) has been described in detail elsewhere [9,10]. Briefly, GODS is a partly randomized study, which examined the efficacy of four antidepressants (paroxetine, clomipramine, venlafaxine and nefazodone) based on a seven-step algorithm in a cohort of 131 subjects (53 men and 78 women) with severe MDD [11] aged 18 to 65 years. Exclusion criteria included pregnancy, schizophrenia or schizoaffective disorder, dependence on alcohol or other substances and treatment with mood-stabilisers or antipsychotics. The present investigation includes data from the first three steps that included treatment with paroxetine (an SRI), initiated at 20mg daily and increased to 30mg and 40mg daily if remission was not achieved. Patients were discharged only if complete remission was obtained as defined by a MADRS score of 8 or less. Of the 131 GODS participants, 82 had available blood DNA samples and reported white European ancestry. The study protocol was approved by the ethics committee of the Geneva University Department of Psychiatry and written informed consent was obtained from all subjects.

### **1.1.4 Pfizer**

A total of 345 patients from eight MDD clinical trials were provided. Study designs were variable and primarily conducted as double-blind, placebo-controlled, 6 to 8 weeks studies with sertraline, fluoxetine or paroxetine as active comparators in addition to the investigational compound. Only subjects from the SRI comparator arms were sent for whole genome genotyping and included in the current study. All study protocols received institutional review board (IRB) approval and informed

consent was obtained from participating subjects prior to sample collection. In all eight trials, a diagnosis and inclusion criterion for MDD was a Hamilton Depression Rating Scale (HAM-D) total score of 22 or higher at screening. Exclusion criteria included DSM-IV diagnosis of psychotic features, bipolar I or II, or major risk for suicide.

### **1.1.5 Glaxo Smith Kline**

The samples from GSK derived from two randomized, double-blind, placebo-controlled comparisons of the antidepressant efficacy and the effects on sexual functioning of Bupropion XL and escitalopram in outpatients with moderate to severe depression [12]. The studies were parallel groups and identically designed, conducted between January 2003 and June 2004 in the United States. Escitalopram or matching placebo capsule was administered at doses of 10mg/day for the first 4 weeks and either 10mg/day, or if clinically indicated, 20mg/day from Week 5 through Week 8. Included subjects had primary diagnosis of Major Depressive Disorder (MDD) with duration at recruitment lasting 12 weeks but no greater than 2 years, and having failed to respond to two adequate trials of antidepressants in the previous 2 years. The primary outcomes for depression was the change from baseline in HAMD-17 total score, whilst the secondary outcomes were percent of subjects in remission and percent of responder (HAMD-17), plus CGI-I and CGI-S. Out of the 210 patients in the escitalopram treatment arms who completed the study, 137 were selected based on availability of consented DNA blood sample and white Caucasian ethnicity; with an average age of 36.4 (from 18 to 64) and 45:55 male to female ratio. All patients provided written informed consent prior to any study activity and the protocol for each of the studies was approved by international review boards.

**Table 1:** Description of the five component studies.

| Study                      | GENDEP                                                                                       | GenPod                                                                                                         | GODS                                                                                                                                                                   | Pfizer                                                                                   | Glaxo-Smith Kline                                                                        |
|----------------------------|----------------------------------------------------------------------------------------------|----------------------------------------------------------------------------------------------------------------|------------------------------------------------------------------------------------------------------------------------------------------------------------------------|------------------------------------------------------------------------------------------|------------------------------------------------------------------------------------------|
| N                          | 868                                                                                          | 601                                                                                                            | 131                                                                                                                                                                    | 355                                                                                      | 191                                                                                      |
| % Female                   | 63.0%                                                                                        | 57.7%                                                                                                          | 59.5%                                                                                                                                                                  | 67.3%                                                                                    | 57.1%                                                                                    |
| Age<br>(average in years ) | 42.6 (SD 11.7)                                                                               | 38.8 (SD 12.4)                                                                                                 | 36.5 (SD 10.6)                                                                                                                                                         | 43.3 (S.D. 13.2)                                                                         | 35.9 (SD 11.3)                                                                           |
| Severity                   | Moderate to Severe                                                                           | Moderate to Severe                                                                                             | Severe                                                                                                                                                                 | Moderate to Severe                                                                       | Moderate to Severe                                                                       |
| Baseline HRSD-17           | 21.8 (SD 5.3)                                                                                |                                                                                                                |                                                                                                                                                                        | 23.6 (S.D. 3.4)                                                                          | 23.7 (SD 3.8)                                                                            |
| Baseline MADRS             | 28.8 (SD 6.8)                                                                                |                                                                                                                | 33.2 (SD 5.2)                                                                                                                                                          |                                                                                          |                                                                                          |
| Baseline BDI               | 28.1 (SD 9.7)                                                                                | 33.5 (SD 9.7)                                                                                                  |                                                                                                                                                                        |                                                                                          |                                                                                          |
| SRI                        | escitalopram                                                                                 | citalopram                                                                                                     | paroxetine                                                                                                                                                             | sertraline,<br>fluoxetine,<br>paroxetine                                                 | escitalopram                                                                             |
| NRI                        | nortriptyline                                                                                | reboxetine                                                                                                     | -                                                                                                                                                                      | -                                                                                        | -                                                                                        |
| Exclusion Criteria         | Personal or family history of bipolar disorder or schizophrenia; active substance dependence | Personal history of bipolar disorder or psychosis; Major substance or alcohol abuse; Medical contraindications | Personal history of schizophrenia or schizoaffective disorder; Dependence on alcohol or other substances; Pregnancy; Treatment with mood stabilizers Or antipsychotics | Personal history of bipolar disorder (I or II), psychotic features; high risk of suicide | Personal history of bipolar disorder (I or II), psychotic features; high risk of suicide |

## 1.2 Quality control

All quality control procedures were undertaken using PLINK [13]. Quality control was first implemented on the marker level than on an individual level.

Individuals were excluded for ambiguous sex (genotypic sex different from phenotypic sex) (n=22) and abnormal heterozygosity on autosomes (n=16). Cryptic relatedness was assessed through identity by descent (IBD) using PLINK [13] to a linkage disequilibrium (LD) pruned dataset. IBD was assessed both within and between studies. Individuals were excluded if they were first, second or third degree relatives (n=20). Genotyping completeness was examined and individuals excluded if completeness was less than 97.5%. Most individuals were complete for all genotyping following removal of poor calling SNPs (n=9).

Markers were excluded if they had a minor allele frequency of less than 0.01 as effects of rare markers on response to antidepressants is not in the scope of the current analysis and the sample is not powered to detect associations with markers below 0.01. Markers were assessed for completeness and markers less than 97% complete were excluded. Hardy-Weinberg equilibrium (HWE) was tested, but was not used as a criterion for exclusion of markers. Since the study is a case only analysis, there may be departures from HWE [14]. HWE was examined for all significantly associated SNPs and is reported in the results.

Sample selection from studies was limited to individuals of white European parentage. In order to ensure this was correct and to check self-reported ethnicity with genetic ethnicity as well as to correct to genetic architecture differences within European populations [15], we performed a principal component analysis using EIGENSTRAT [16]. An LD pruned dataset was used to remove confounding by local LD. The LD pruned dataset contained 30298 SNPs in low LD and excluded known

region of long-range LD [16]. A single EIGENSTRAT analysis was conducted with samples from all studies and run iteratively. The first iteration was run with five HapMap populations (CEU, YRI, CHB, JPT and GIH) and 35 individuals were excluded as outliers and removed from further analyses as analysis indicated they had strong African or Indian admixtures. After their exclusion, a second iteration was performed on just sample. No outliers were detected and the first four principal components were nominally significant (Tracy-Widom  $p < 0.05$ ), and these were used as covariates in the genetic association analyses.

### **1.3 Definition of antidepressant response phenotype**

Response to antidepressants is a complex phenotype that involves changes in depressive symptoms over a number of weeks and best assessed by repeated administration of depression rating scales such as the Hamilton Rating Scale for Depression (HRSD-17) [17], Montgomery and Asberg depression rating scale (MADRS) [18] or Beck Depression Inventory (BDI) [8]. Since response to antidepressants is a matter of degree rather than a dichotomous yes-or-no, we defined the outcome as a continuous variable, reflecting the proportional reduction of depression severity from baseline to study exit [19-22].

Studies included in NEWMEDS used different scales as primary outcome measures. MADRS was the primary outcome measure in GENDEP and GODS, HRSD-17 was the primary outcome measure in the studies conducted by Pfizer and GSK, and BDI was the primary outcome measure in GenPod. To allow an unbiased analysis of the combined dataset, we converted the outcome measures within each study to a single continuous metric: a standardized change score, adjusted for sex, age and recruitment centre in multi-centre studies within each contributing study. First, a change score was calculated as percentage reduction in depression severity over 12 weeks of



antidepressant treatment, with missing values at study exit imputed based on earlier measurements, using mixed effect linear models, as previously described [23]. In agreement with our previous study [22], we chose percentage change because it is uncorrelated with initial severity, relatively independent of which scale is used, and closely reflects clinician's impression of improvement [24]. Imputation of missing end-point data based on mixed effect models minimized the biases inherent in procedures such as last-estimation carried forward [23,25,26]. Second, we adjusted the percentage change for sex, age and recruitment centre in multi-centre studies within each study, to avoid results being confounded through these variables. Third, to avoid confounding by data origin, the adjusted change score was z-transformed within each study (i.e. linearly converted to a variable with a mean of zero and a standard deviation of 1). This final step removes any correlation between data origin and outcome prior to the genetic analysis.

## 1.4 Power analysis

Our aim was to determine if any common genetic variant predicts a clinically significant difference in the outcome of treatment with antidepressants. Clinical significance was previously defined as a difference of at least 3 points in the reduction of depression symptoms severity on HRSD-17 [27,28]. We aimed to achieve 80% power to detect an additive genetic effect that explains 6.33% of variance in outcome, corresponding to a 3 HRSD-17 point difference in a drug comparison study [27].

Power analysis was conducted using the Genetic Power Calculator [29]. We carried out both individual-level analyses and meta-analyses. Since the power for fixed effects meta-analysis and individual-level data are identical, we only present one set of power calculations [30]. We factored in imperfect tagging (at  $R^2 = 0.8$ ) to estimate power for detecting effects of genotyped or ungenotyped variants. This assumption is in fact conservative: a report examining this issue has found that the coverage of the Illumina 610/660 chip is 87%, and across a range of effect sizes the power for finding association with genotyped variants drops by less than <10% (and often <5%) compared to complete genome-wide genotyping [31].

Three of the four analyses had well over 80% power to detect a clinically significant variant at the genome wide significance level ( $p < 5 \times 10^{-8}$ ) with imperfect tagging of  $R^2 = 0.8$  (overall, SRI, and genotype-drug interaction). The fourth analysis (NRI) had only 27% power to detect a clinically significant variant at the genome wide significance level. In the meta-analysis with STAR\*D, both analyses had adequate power (greater than 80%) to detect a clinically significant variant at the genome wide significance level.

We further investigated if our samples had the power to detect an effect explaining half the clinical significant (3.165%). The meta-analysis of NEWMEDS and STAR\*D

had adequate power (greater than 80%) to detect a variant of this size at the genome wide significance level.

## **2 Suggestive results from the whole genome analyses in NEWMEDS**

### **2.1 Response to any antidepressant**

Two SNPs were associated with outcome at the suggestive level of significance (rs10818702  $p=2.19*10^{-6}$ ; rs11624702  $p=4.08*10^{-6}$ ). rs10818702 is located on chromosome 9 in an intron of *OR1J2* (olfactory receptor, family 1, subfamily J). *OR1J2* is a G-protein-coupled receptor, also expressed in the amygdala and cerebellum.

rs11624702 is located on chromosome 14 in an intron of *MDGA2* (MAM domain containing glycosylphosphatidylinositol anchor 2), a novel member of the adhesion molecules of the immunoglobulin superfamily involved in cell adhesion, migration, and recruitment to inflammatory sites [32]. *MDGA2*, formerly *MAMDC1*, has been associated with neuroticism and neuroticism-related phenotypes in a whole genome and targeted replicated studies [33-35]. Neuroticism, a personality trait reflecting a tendency towards negative mood states, is strongly related to depression and shares genetic predisposition with depressive phenotypes [36,37].

### **2.2 Response to Serotonergic Antidepressants**

Four SNPs were associated with outcome at the suggestive level ( $p<5*10^{-6}$ ). The strongest associated SNP was rs10783282 ( $p=1.16*10^{-6}$ ), located on chromosome 12 within an intron of *LOC255411*, a validated non-coding RNA (miscRNA), and 13kb upstream of *ADCY6*, adenylate cyclase 6 isoform A, a membrane-associated enzyme which catalyzes the formation of the secondary messenger cyclic adenosine monophosphate (cAMP), and is implicated in sleep/wake cycle regulation [38,39].

*ADCY6* expression is modulated by *miR-182* [38], and variation within pre-cursor *miR-182*, is associated with late insomnia in individuals with MDD [39].

Additionally, individuals with depression have been reported to have reduced platelet ADCY activity [40,41] and a gene in the ADCY family was associated with depression in a genome wide study [40].

Two associated SNPs were on chromosome 5 within *ADAMTS6* (rs1493451  $p=2.35*10^{-6}$ ; rs7708972  $p=2.49*10^{-6}$ ). These SNPs are in high LD ( $r^2=0.84$ ) making a single association signal. *ADAMTS6* is a disintegrin and metalloproteinase with thrombospondin motifs, and member of a family of proteins implicated in the turnover of the extracellular matrix [42]. *ADAMTS6* transcription is regulated by the pro-inflammatory cytokine TNF $\alpha$  [42], suggesting a link between inflammatory regulation and the action of antidepressants.

The remaining associated SNP (rs10515893  $p=1.37*10^{-6}$ ) was in an intergenic region on chromosome 5, 1.8Mb away from the nearest gene.

### **2.3 Response to Noradrenergic Antidepressants**

Two SNPs located within *HIBADH* were the top results (rs13237776  $p=1.76*10^{-6}$ ; rs12534474  $p=1.76*10^{-6}$ ). These two SNPs are in complete LD ( $r^2=1.0$ ) indicating a single association signal. *HIBADH* encodes for a 3-hydroxyisobutyrate dehydrogenase, a dimeric mitochondrial enzyme that catalyzes the NAD dependent reversible oxidation of 3-hydroxyisobutyrate. Another SNP located on chromosome 6 11kb upstream of *ARHGAP18* was associated with improvement during treatment with noradrenergic antidepressants just below the suggestive level of evidence ( $p=5.83*10^{-6}$ ). *ARHGAP18* is part of the human RhoGAP family of GTPase-activating proteins, which are important in neuronal development and plasticity.

## 2.4 Differential response to serotonergic and noradrenergic antidepressants

Two of these SNPs were on chromosome 15: rs2279447 ( $p=8.87*10^{-7}$ ) and rs1455773 ( $p=1.84*10^{-6}$ ). rs2279447 is located 1.6kb upstream of *ST8SIA2* (ST8 alpha-N-acetylneuraminide alpha-2,8-sialyltransferase, encoding a type II membrane protein) and 1.3kb upstream from hypothetical protein *C15orf32*. rs1455773 is located within the first exon of the hypothetical protein *C15orf32* and is a missense mutation (Alanine to Threonine change). Two further associated SNPs are on chromosome 1 within introns of a hypothetical non-coding RNA, *LOC400794* (rs1409414  $p=1.33*10^{-6}$ ; rs7549782  $p=1.44*10^{-6}$ ), and 126kb upstream of *MGST3* (microsomal glutathione S-transferase 3), a human-specific intestinal drug metabolizing enzyme. The remaining two associated SNPs (rs280060  $p=1.82*10^{-6}$ ; rs4424090  $p=1.48*10^{-6}$ ) were in intergenic regions on chromosome 4 and 6, more than 100kb away from the nearest known genes.

Two markers of differential response to SRI and NRI are located downstream of *ST8SIA2*, which is highly expressed throughout the brain (Allen Brain Atlas, <http://www.brain-map.org/>) and may modulate neural cell adhesion (NCAM) [43]. *ST8SIA2*-mediated polysialylation of NCAM has been implicated in the etiology of MDD with NCAM knockout mice expressing behavioral symptoms of depression which are reversible with antidepressant treatment [44] and in the action of psychotropic drugs, including the mood-stabilizer valproic acid [45]. Moreover, *ST8SIA2* is located under a linkage peak for recurrent early onset MDD [46] and *ST8SIA2* variants have been associated with risk for schizophrenia and bipolar disorder [47-49].

**Table 2: Top results from the four genome-wide analyses. Markers shown in bold italics had the lowest p-value for that analysis.** CHR=Chromosome; HWE=Hardy-Weinberg Equilibrium; MAF=Minor Allele Frequency. Regression coefficient is standardized and can be interpreted as a measure of effect size: it is the number of standard deviations in outcome per minor allele. Positive values of regression coefficient mean that carriers of more minor alleles had better treatment outcome. Negative values of regression coefficient mean that carriers of more minor alleles had worse outcomes.

|                                  |     |            |           |                                   |        | Linear Regression Analyses |                 |                            |                 |                            |                 |                                 |                 | HWE  | MAF  |
|----------------------------------|-----|------------|-----------|-----------------------------------|--------|----------------------------|-----------------|----------------------------|-----------------|----------------------------|-----------------|---------------------------------|-----------------|------|------|
|                                  |     |            |           |                                   |        | Whole Sample (n=1790)      |                 | Serotonergic Only (n=1222) |                 | Noradrenergic Only (n=568) |                 | Gene by Drug Interaction(n=949) |                 |      |      |
| Phenotype                        | CHR | SNP        | Position  | Nearest Gene                      | Allele | Regression Coefficient     | P-Value         | Regression Coefficient     | P-Value         | Regression Coefficient     | P-Value         | Regression Coefficient          | P-Value         |      |      |
| Whole Sample Analysis (n=1790)   | 9   | rs10818702 | 124285545 | <i>OR1J2</i>                      | A      | <b>-0.19</b>               | <b>2.19E-06</b> | -0.21                      | 2.42E-05        | -0.14                      | 0.04            | 0.12                            | 0.27            | 0.94 | 0.22 |
|                                  | 14  | rs11624702 | 46588187  | <i>MDGA2</i>                      | A      | <b>0.15</b>                | <b>4.08E-06</b> | 0.14                       | 3.32E-04        | 0.16                       | 3.83E-03        | 0.002                           | 0.98            | 0.48 | 0.47 |
| Serotonergic Analysis (n=1222)   | 5   | rs7708972  | 64724497  | <i>ADAMTS6</i>                    | G      | -0.14                      | 2.37E-05        | <b>-0.19</b>               | <b>2.49E-06</b> | -0.03                      | 0.61            | 0.16                            | 0.08            | 0.25 | 0.49 |
|                                  | 5   | rs1493451  | 64762196  | <i>ADAMTS6</i>                    | G      | -0.13                      | 9.20E-05        | <b>-0.19</b>               | <b>2.35E-06</b> | -5.47E-04                  | 0.99            | 0.2                             | 0.03            | 0.65 | 0.46 |
|                                  | 5   | rs10515893 | 164692074 |                                   | A      | -0.16                      | 1.21E-05        | <b>-0.21</b>               | <b>1.37E-06</b> | -0.05                      | 0.44            | 0.17                            | 0.1             | 0.2  | 0.27 |
|                                  | 12  | rs10783282 | 47433214  | <i>ADCY6</i>                      | A      | -0.16                      | 4.96E-05        | <b>-0.24</b>               | <b>1.16E-06</b> | 7.73E-05                   | 0.99            | 0.19                            | 0.08            | 0.1  | 0.22 |
| Noradrenergic Analysis (n=568)   | 7   | rs13237776 | 27676198  | <i>HIBADH</i>                     | A      | -0.12                      | 2.94E-03        | -0.01                      | 0.79            | <b>-0.34</b>               | <b>1.77E-06</b> | -0.24                           | 0.03            | 0.7  | 0.19 |
|                                  | 7   | rs12534474 | 27677080  | <i>HIBADH</i>                     | A      | -0.12                      | 2.78E-03        | -0.01                      | 0.77            | <b>-0.34</b>               | <b>1.77E-06</b> | -0.24                           | 0.03            | 0.7  | 0.2  |
| Gene by Drug Interaction (n=949) | 1   | rs1409414  | 163736265 | <i>RXRG</i>                       | A      | 0.02                       | 0.74            | -0.12                      | 0.09            | 0.3                        | 2.62E-03        | <b>0.72</b>                     | <b>1.33E-06</b> | 0.72 | 0.09 |
|                                  | 1   | rs7549782  | 163740216 | <i>RXRG</i>                       | A      | 0.02                       | 0.77            | -0.12                      | 0.08            | 0.3                        | 2.41E-03        | <b>0.72</b>                     | <b>1.44E-06</b> | 0.72 | 0.09 |
|                                  | 4   | rs280060   | 95177048  |                                   | C      | 0.04                       | 0.23            | 0.14                       | 3.92E-04        | 0.15                       | 7.23E-04        | <b>-0.42</b>                    | <b>1.82E-06</b> | 0.44 | 0.49 |
|                                  | 6   | rs4424090  | 99253795  |                                   | A      | -0.14                      | 0.12            | 0.03                       | 0.78            | -0.61                      | 5.56E-04        | <b>-1.29</b>                    | <b>1.48E-06</b> | 1    | 0.03 |
|                                  | 15  | rs2279447  | 90814564  | <i>ST8SIA2</i><br><i>C15orf32</i> | G      | -0.02                      | 0.54            | 0.06                       | 0.15            | -0.18                      | 2.63E-03        | <b>-0.46</b>                    | <b>8.86E-07</b> | 0.41 | 0.32 |
|                                  | 15  | rs1455773  | 90816431  | <i>ST8SIA2</i><br><i>C15orf32</i> | A      | -0.01                      | 0.78            | 0.07                       | 0.09            | -0.17                      | 5.64E-03        | <b>-0.45</b>                    | <b>1.84E-06</b> | 0.71 | 0.32 |

### 3 Pathway Analysis in NEWMEDS

#### 3.1 Methods

The gene sets used in our pathway analyses came from five publicly-available sources: 1) Gene Ontology (GO) [50], accessed on November 8<sup>th</sup> 2011, 2)KEGG (Kyoto Encyclopedia of Genes and Genomes pathways; [ftp://ftp.genome.jp/pub/kegg/genes/organisms/hsa/hsa\\_pathway.list](ftp://ftp.genome.jp/pub/kegg/genes/organisms/hsa/hsa_pathway.list)) accessed on June 27<sup>th</sup> 2011 3)Mouse Genome Informatics (MGI) database [51], accessed on February 22<sup>nd</sup>, 2010, 4)PANTHER (Protein Analysis THrough Evolutionary Relationships) [52], accessed on August 20<sup>th</sup> 2010, and 5) the “canonical pathways” collection from the Molecular Signatures Database (MSigDB) [53], accessed on February 2<sup>nd</sup> 2011. Gene sets were required to contain between 3 and 300 genes to be included in the analysis, giving a total of 14,518 gene sets. A large collection of gene sets was used to maximise the chance of at least one gene set corresponding to the (unknown) disease biology.

Pathway analysis of the GWAS data was carried out using ALIGATOR (Association List Go AnnoTatOR), as described in Holmans et al. [54], using the gene sets described above. ALIGATOR converts a list of significant and nominally significant SNPs into a list of significant genes, and tests this list for enrichment within defined categories. ALIGATOR corrects for variable numbers of SNPs per gene and variable gene size. This allows us to obtain p-values for enrichment for each gene set, correct these for testing multiple non-independent gene sets, and to test whether the number of significantly enriched gene sets is higher than expected. Gene sets required at least two signals to be counted as enriched to remove the possibility of a small gene set

being deemed significantly enriched based on one signal. An important modification to the original ALIGATOR method is that significant genes in the same gene set that mapped less than 1Mb apart (and thus could be explained by the same association signal) were counted as a single signal. SNPs that mapped within the boundaries of a gene (genome build 36\_3) were assigned to that gene: if SNPs mapped within more than one gene, they were assigned to all such genes. 224,475 SNPs were assigned to 16,976 genes by this method.

Following Stergiakouli et al. [55], the list of significant genes was chosen to encompass the top 5% of all genes covered by SNPs, a total of 848 genes. This corresponded to a p-value criterion of approximately 0.007 (varying slightly between phenotypes) for defining significant SNPs (with between 3,377 and 3,762 SNPs so defined – see Table 3).

### **3.2 Results**

The numbers of pathways enriched at various levels of significance ( $p=0.05$ ,  $p=0.01$ ,  $p=0.001$ ) are given in Table 3, together with a p-value from a test of whether the number of pathways reaching each level of enrichment was significantly greater than would be expected by chance. A greater than expected number of significantly enriched pathways would indicate the presence of underlying disease biology tagged by the pathways tested. However, it can be seen from Table 3 that none of the phenotypes yielded a significant excess of enriched pathways at any of the significance levels of enrichment. Furthermore, no pathway yielded a pathway-specific p-value for enrichment that was sufficiently significant to withstand correction for multiple testing of pathways.



**Table 3:** Numbers of significantly-enriched pathways from ALIGATOR analyses of GWAS data, together with p-values testing whether the number of enriched pathways is higher than expected by chance.

| Phenotype                        | p-value criterion | Number of top SNPs | p<0.05             |         | p<0.01             |         | p<0.001            |         |
|----------------------------------|-------------------|--------------------|--------------------|---------|--------------------|---------|--------------------|---------|
|                                  |                   |                    | Number of pathways | p-value | Number of pathways | p-value | Number of pathways | p-value |
| Gene by Drug Interaction (n=949) | 0.0068            | 3530               | 392                | 0.108   | 79                 | 0.155   | 11                 | 0.182   |
| Whole Sample Analysis (n=1790)   | 0.0065            | 3615               | 391                | 0.126   | 77                 | 0.182   | 10                 | 0.240   |
| Noradrenergic Analysis (n=568)   | 0.0073            | 3377               | 298                | 0.475   | 54                 | 0.540   | 5                  | 0.630   |
| Serotonergic Analysis (n=1222)   | 0.0068            | 3762               | 397                | 0.113   | 95                 | 0.073   | 13                 | 0.120   |

#### 4 Meta-analysis with STAR\*D

Meta-analysis for other psychiatric disorders, such as bipolar disorder [56] and schizophrenia [57], have successfully discovered genome wide significant associations when preliminary sample analyses were moderately successful. We attempt a meta-analysis between NEWMEDS and STAR\*D to see if increasing the power through increased sample size would aid in finding a genome wide significant association.

#### 4.1 Materials and Methods

##### 4.1.1 STAR\*D

##### 4.1.1.1 Sample

The Sequenced Treatment Alternatives to Relieve Depression (STAR\*D) study has been described in detail elsewhere [58,59]. Briefly, STAR\*D included 4041 treatment-seeking adult outpatients (18-75 years) with a diagnosis of non-psychotic unipolar major depressive disorder. Treatment-seeking Individuals were recruited in 18 primary care and 23 psychiatric clinical sites across the United States [58] and had a minimal depression severity of 14 on Hamilton Rating Scale for Depression

(HRSD-17) [17]. For the replication and meta-analysis presented here, only data from the first treatment step, protocol-guided citalopram (an SRI) 20 to 60mg daily was included [59]. STAR\*D was approved by institutional ethics review boards in all centres. All participants provided a written consent after the procedures and any associated risks were explained.

#### **4.1.1.2 Genotyping and Quality Control**

Genetic material was collected from 1,948 individuals and genotyped on the Human Mapping 500K Array Set (n=969) or Affymetrix Genome-Wide SNP Array 5.0 (Affymetrix, South San Francisco, California, USA) (n=979) as previously described [60].

Quality control was implemented using PLINK [13]. Markers were included if they had a minor allele frequency over 0.01, and at least 95% complete genotyping increasing to 99% if the minor allele frequency was below 0.05 following the criteria set by the Wellcome Trust Case Control Consortium when they used data from the same platform [61]. To avoid batch artefacts, markers that differed significantly ( $p < 1 \times 10^{-3}$ ) by genotyping centre/platform were excluded.

Individuals were excluded for ambiguous sex (n=115), abnormal heterozygosity (n=3), cryptic relatedness up to third-degree relatives by identity by descent (n=13), genotyping completeness less than 97% (n=5), non-European ethnicity admixture detected as outliers in an iterative EIGENSTRAT analyses of an LD-pruned dataset (n= 681), and invalid phenotypic information (n=24), resulting in 1,107 genotyped individuals for the analysis.

##### **4.1.1.2.1 EIGENSTRAT**

Sample selection from STAR\*D for this analysis was limited to individuals of white European parentage. This was done in order to best replicate the individuals included

in the NEWMEDS sample who were all of white European ancestry. In order to ensure this was correct and to check self-reported ethnicity with genetic ethnicity as well as to correct to genetic architecture differences within European populations [15], we performed a principal component analysis using EIGENSTRAT [16]. An LD pruned dataset was used to remove confounding by local LD. The LD pruned dataset contained 83428 SNPs in low LD and excluded known region of long-range LD [16]. As the STAR\*D is from an admixed population which includes mixed race individuals, this step was undertaken very stringently. A single EIGENSTRAT analysis was conducted with STAR\*D and run iteratively. The first iteration was run with four HapMap populations (CEU, YRI, CHB, and JPT) to remove any individuals of non-caucasoid ancestry. A second iteration was run with three HapMap populations (CEU, MEX, and GIH) to ensure the sample was of white European ancestry only. Any individual was excluded as outliers and removed from further analyses as analysis if it was indicated they had strong African, Indian or Hispanic admixtures (n=548). After their exclusion, a third iteration was performed on just sample. Only individuals within 3 standard deviations of the mean from the first 10 principal components were included in the analysis (n=133). This step was essential to ensure outliers were removed and create as homogenous a sample as possible. A fourth analysis was run which detected no outliers and the first six principal components were nominally significant (Tracy-Widom  $p < 0.05$ ), and these were used as covariates in the genetic association analyses.

## **4.2 Imputation**

To get the best coverage of the genome and overlap between the two samples, both NEWMEDS and STAR\*D were imputed to include over 1.4 million markers using BEAGLE3.3 [62] and the HapMap phase 3 CEU population was the reference dataset.

Analyses were conducted on dosage data with estimated probability of each genotype, in order to consider the uncertainty of the imputation. The accuracy of imputation is reported for each result. Imputed data was analysed for association to outcome using the *dosage* command in PLINK<sup>13</sup> in any antidepressant taken (NEWMEDS n=1790, STAR\*D n=1107) and in SRI treated individuals only (NEWMEDS n=1222, STAR\*D n=1107). Imputation analyses also included covariates from EIGENSTRAT to correct for population stratification, as was done in the original analyses respectively for each sample.

### **4.3 Analysis**

Meta-analysis was done using the '*meta*' command in PLINK [13]. Both fixed effects and random effects are reported. Two test of heterogeneity, Cochran's Q statistic and I<sup>2</sup> heterogeneity index, are reported to demonstrate the heterogeneity between the two studies. Standard errors for the meta-analyses were calculated as the inverse sum of the individual studies variance divided by the square root of the number of informative individual studies.

### **4.4 Results**

#### **4.4.1 Any Antidepressant**

2897 individuals were included in the meta-analysis which tested over 1.1 million SNPs between all NEWMEDS individuals treated with any antidepressants (n=1790) and STAR\*D (n=1107). There were no genome wide significant results from the fixed or random effects meta-analysis between all of NEWMEDS and STAR\*D. Table 4 shows the results from the fixed effects meta-analysis which reached genome wide suggestive threshold ( $p < 5 * 10^{-6}$ ) and table 5 shows the results for the random effects meta-analysis reaching the genome wide suggestive threshold.

**Table 4:** Genome wide suggestive ( $p < 5 \times 10^{-6}$ ) results from the fixed effects meta-analysis between any antidepressant NEWMEDS and STAR\*D. CHR=chromosome. Q=Cochrane's Q statistic for heterogeneity. I= $I^2$  heterogeneity index. Regression coefficient is standardized and can be interpreted as a measure of effect size: it is the number of standard deviations in outcome per minor allele. Positive values of regression coefficient mean that carriers of more minor alleles had better treatment outcome. Negative values of regression coefficient mean that carriers of more minor alleles had worse outcomes.

| CHR | SNP        | Position | Gene       | Allele | P-value  | Regression Coefficient | Q     | I     |
|-----|------------|----------|------------|--------|----------|------------------------|-------|-------|
| 1   | rs4650199  | 73424710 | Intergenic | C      | 5.98E-07 | 0.131                  | 0.136 | 55.01 |
| 1   | rs11210177 | 73428409 | Intergenic | A      | 7.59E-07 | -0.133                 | 0.168 | 47.46 |
| 1   | rs12069039 | 73430673 | Intergenic | C      | 1.19E-06 | 0.127                  | 0.126 | 57.38 |
| 1   | rs7514832  | 73431095 | Intergenic | A      | 1.11E-06 | -0.127                 | 0.127 | 56.96 |
| 1   | rs10890018 | 73434757 | Intergenic | A      | 1.14E-06 | -0.127                 | 0.130 | 56.87 |
| 1   | rs7522520  | 73437151 | Intergenic | C      | 1.24E-06 | -0.126                 | 0.123 | 57.98 |
| 1   | rs4650201  | 73438432 | Intergenic | A      | 1.03E-06 | -0.127                 | 0.123 | 57.89 |
| 1   | rs6684841  | 73479037 | Intergenic | A      | 2.51E-07 | 0.134                  | 0.079 | 67.6  |
| 1   | rs11210187 | 73487821 | Intergenic | C      | 5.97E-07 | 0.130                  | 0.085 | 66.31 |
| 1   | rs4650206  | 73493165 | Intergenic | C      | 6.20E-07 | 0.130                  | 0.090 | 65.28 |
| 1   | rs4571923  | 73509150 | Intergenic | A      | 1.13E-06 | 0.128                  | 0.081 | 67.07 |
| 1   | rs11210193 | 73516461 | Intergenic | A      | 8.97E-07 | 0.128                  | 0.072 | 69.17 |
| 1   | rs7549372  | 73528117 | Intergenic | A      | 4.59E-07 | -0.131                 | 0.050 | 74.06 |
| 1   | rs7523829  | 73530705 | Intergenic | A      | 1.12E-06 | 0.127                  | 0.089 | 65.54 |
| 1   | rs10789368 | 73586747 | Intergenic | A      | 2.07E-06 | 0.123                  | 0.048 | 74.32 |
| 1   | rs11210220 | 73622243 | Intergenic | G      | 3.37E-06 | -0.123                 | 0.079 | 67.62 |
| 1   | rs11210222 | 73622275 | Intergenic | C      | 3.73E-06 | -0.123                 | 0.070 | 69.48 |
| 1   | rs6671130  | 73624275 | Intergenic | G      | 2.84E-06 | -0.124                 | 0.082 | 66.95 |
| 1   | rs6671002  | 73624340 | Intergenic | A      | 3.22E-06 | 0.123                  | 0.080 | 67.32 |
| 1   | rs1923236  | 73626414 | Intergenic | C      | 3.08E-06 | -0.123                 | 0.080 | 67.28 |
| 1   | rs12044079 | 73626735 | Intergenic | C      | 3.51E-06 | 0.122                  | 0.084 | 66.42 |
| 1   | rs1338654  | 73630312 | Intergenic | G      | 3.23E-06 | 0.123                  | 0.086 | 66.13 |
| 1   | rs1885251  | 73638608 | Intergenic | G      | 1.08E-07 | 0.138                  | 0.020 | 81.5  |
| 1   | rs12035848 | 73643489 | Intergenic | A      | 2.96E-06 | -0.123                 | 0.082 | 66.86 |
| 1   | rs7543202  | 73645473 | Intergenic | A      | 3.52E-06 | 0.123                  | 0.104 | 62.1  |
| 1   | rs11210235 | 73650782 | Intergenic | C      | 1.54E-07 | -0.136                 | 0.015 | 82.99 |
| 1   | rs10465868 | 73653242 | Intergenic | A      | 8.35E-08 | 0.139                  | 0.027 | 79.68 |
| 1   | rs7521446  | 73662978 | Intergenic | C      | 6.52E-08 | -0.140                 | 0.022 | 81.04 |
| 1   | rs11210242 | 73670397 | Intergenic | C      | 1.12E-07 | 0.138                  | 0.018 | 82.21 |
| 1   | rs4113050  | 73682643 | Intergenic | C      | 1.73E-07 | -0.135                 | 0.015 | 83.09 |
| 1   | rs11210251 | 73685387 | Intergenic | C      | 1.19E-07 | 0.137                  | 0.017 | 82.44 |
| 1   | rs11210255 | 73704325 | Intergenic | A      | 3.65E-06 | -0.120                 | 0.032 | 78.23 |
| 1   | rs12754690 | 73712486 | Intergenic | C      | 5.25E-07 | 0.129                  | 0.018 | 82.12 |
| 1   | rs11210266 | 73736900 | Intergenic | G      | 1.43E-06 | 0.124                  | 0.016 | 82.67 |
| 11  | rs1426651  | 96681529 | Intergenic | C      | 3.13E-06 | 0.131                  | 0.771 | 0     |
| 15  | rs6598518  | 96891353 | Intergenic | A      | 3.79E-06 | -0.187                 | 0.914 | 0     |
| 19  | rs10426624 | 40365083 | FCGBP      | A      | 4.91E-06 | -0.125                 | 0.474 | 0     |
| 19  | rs10426076 | 40365173 | FCGBP      | C      | 4.76E-06 | -0.126                 | 0.483 | 0     |
| 20  | rs6040194  | 10777979 | Intergenic | G      | 1.95E-06 | -0.166                 | 0.899 | 0     |

**Table 5:** Genome wide suggestive ( $p < 5 \times 10^{-6}$ ) results from the random effects meta-analysis between any antidepressant NEWMEDS and STAR\*D. CHR=chromosome. Q=Cochrane's Q statistic for heterogeneity. I= $I^2$  heterogeneity index. Regression coefficient is standardized and can be interpreted as a measure of effect size: it is the number of standard deviations in outcome per minor allele. Positive values of regression coefficient mean that carriers of more minor alleles had better treatment outcome. Negative values of regression coefficient mean that carriers of more minor alleles had worse outcomes.

| CHR | SNP        | Position | Gene       | Allele | P-value  | Regression Coefficient | Q     | I |
|-----|------------|----------|------------|--------|----------|------------------------|-------|---|
| 11  | rs1426651  | 96681529 | Intergenic | C      | 3.13E-06 | 0.131                  | 0.771 | 0 |
| 15  | rs6598518  | 96891353 | Intergenic | A      | 3.79E-06 | -0.186                 | 0.914 | 0 |
| 19  | rs10426624 | 40365083 | FCGBP      | A      | 4.91E-06 | -0.125                 | 0.474 | 0 |
| 19  | rs10426076 | 40365173 | FCGBP      | C      | 4.76E-06 | -0.126                 | 0.483 | 0 |
| 20  | rs6040194  | 10777979 | Intergenic | G      | 1.95E-06 | -0.166                 | 0.899 | 0 |

#### 4.4.2 Serotonergic Antidepressants

There were no genome wide significant results from the fixed or random effects meta-analysis between SRI treated NEWMEDS and STAR\*D in the 1.1 million markers tested between the two studies in the 2329 individuals included (NEWMEDS n=1222 and STAR\*D n=1107).

Table 6 shows the results from the fixed effects meta-analysis which reached genome wide suggestive threshold ( $p < 5 \times 10^{-6}$ ) and table 7 shows the results for the random effects meta-analysis reaching the genome wide suggestive threshold.

**Table 6:** Genome wide suggestive ( $p < 5 \times 10^{-6}$ ) results from the fixed effects meta-analysis between serotonergic antidepressants in NEWMEDS and STAR\*D. CHR=chromosome; Q=Cochrane's Q statistic for heterogeneity. I= $I^2$  heterogeneity index. Regression coefficient is standardized and can be interpreted as a measure of effect size: it is the number of standard deviations in outcome per minor allele. Positive values of regression coefficient mean that carriers of more minor alleles had better treatment outcome. Negative values of regression coefficient mean that carriers of more minor alleles had worse outcomes.

| CHR | SNP        | Position | Gene       | Allele | P-value  | Regression Coefficient | Q     | I     |
|-----|------------|----------|------------|--------|----------|------------------------|-------|-------|
| 1   | rs6684841  | 73479037 | Intergenic | A      | 1.54E-06 | 0.1405                 | 0.089 | 65.68 |
| 1   | rs11210193 | 73516461 | Intergenic | A      | 1.84E-06 | 0.1393                 | 0.111 | 60.73 |
| 1   | rs7549372  | 73528117 | Intergenic | A      | 8.33E-07 | -0.1435                | 0.083 | 66.76 |
| 1   | rs10789368 | 73586747 | Intergenic | A      | 2.82E-06 | 0.1356                 | 0.084 | 66.45 |
| 1   | rs1885251  | 73638608 | Intergenic | G      | 2.33E-07 | 0.1502                 | 0.034 | 77.81 |
| 1   | rs11210235 | 73650782 | Intergenic | C      | 2.57E-07 | -0.1493                | 0.028 | 79.17 |
| 1   | rs10465868 | 73653242 | Intergenic | A      | 2.43E-07 | 0.1498                 | 0.040 | 76.28 |
| 1   | rs7521446  | 73662978 | Intergenic | C      | 1.88E-07 | -0.1512                | 0.033 | 78.04 |
| 1   | rs11210242 | 73670397 | Intergenic | C      | 3.93E-07 | 0.1471                 | 0.024 | 80.44 |
| 1   | rs4113050  | 73682643 | Intergenic | C      | 6.11E-07 | -0.1445                | 0.020 | 81.61 |
| 1   | rs11210251 | 73685387 | Intergenic | C      | 4.10E-07 | 0.1469                 | 0.023 | 80.61 |
| 1   | rs505725   | 73702993 | Intergenic | A      | 3.28E-06 | -0.1341                | 0.083 | 66.63 |
| 1   | rs622421   | 73703081 | Intergenic | A      | 4.98E-06 | 0.1321                 | 0.058 | 72.22 |
| 1   | rs11210255 | 73704325 | Intergenic | A      | 2.20E-06 | -0.1366                | 0.076 | 68.15 |
| 1   | rs12754690 | 73712486 | Intergenic | C      | 1.88E-06 | 0.1366                 | 0.021 | 81.11 |
| 1   | rs11210266 | 73736900 | Intergenic | G      | 4.04E-06 | 0.1326                 | 0.020 | 81.39 |
| 9   | rs7870795  | 99613941 | ZNF782     | C      | 3.15E-06 | 0.1485                 | 0.713 | 0     |
| 9   | rs7859751  | 99615709 | ZNF782     | A      | 2.84E-06 | 0.1492                 | 0.703 | 0     |
| 11  | rs1426651  | 96681529 | ADAMTSL3   | C      | 2.29E-06 | 0.1469                 | 0.382 | 0     |
| 15  | rs1566088  | 84607033 | ADAMTSL3   | C      | 4.83E-06 | 0.1342                 | 0.180 | 44.41 |
| 15  | rs4887218  | 84608081 | ADAMTSL3   | A      | 4.40E-06 | -0.1346                | 0.184 | 43.42 |
| 15  | rs7181181  | 84610029 | ADAMTSL3   | C      | 4.17E-06 | -0.1351                | 0.174 | 45.93 |
| 15  | rs8041327  | 84610811 | ADAMTSL3   | C      | 4.34E-06 | 0.1349                 | 0.181 | 44.15 |

**Table 7:** Genome wide suggestive ( $p < 5 \times 10^{-6}$ ) results from the random effects meta-analysis between serotonergic antidepressants in NEWMEDS and STAR\*D. CHR=chromosome. Q=Cochrane's Q statistic for heterogeneity. I= $I^2$  heterogeneity index. Regression coefficient is standardized and can be interpreted as a measure of effect size: it is the number of standard deviations in outcome per minor allele. Positive values of regression coefficient mean that carriers of more minor alleles had better treatment outcome. Negative values of regression coefficient mean that carriers of more minor alleles had worse outcomes.

| CHR | SNP       | Position | Gene       | Allele | P-value  | Regression Coefficient | Q     | I |
|-----|-----------|----------|------------|--------|----------|------------------------|-------|---|
| 9   | rs7870795 | 99613941 | ZNF782     | C      | 3.15E-06 | 0.1485                 | 0.713 | 0 |
| 9   | rs7859751 | 99615709 | ZNF782     | A      | 2.84E-06 | 0.1492                 | 0.703 | 0 |
| 11  | rs1426651 | 96681529 | Intergenic | C      | 2.29E-06 | 0.1469                 | 0.382 | 0 |

## **5 Polygene scoring**

Recent work in other psychiatric traits, such as schizophrenia [63,64], has suggested a large number of common variants may be playing a role in the development of the trait. While both our main analysis in NEWMEDS and the meta-analysis with STAR\*D had sufficient power to detect clinically significant association, there could be multiple weak across the genome which may offer insight into the other mechanism of antidepressant response.

### **5.1 Method**

The methodology for polygene scoring has been described extensively elsewhere [63]. Here, scores were created based on analysis from the imputed data from NEWMEDS. The risk alleles were weighted by the strength of their association. SNPs were removed if they had a low minor allele frequency ( $MAF < 0.02$ ) or resided in the major histocompatibility complex (MHC) region. The dataset was pruned for linkage disequilibrium ( $r^2 < 0.25$ ) removing SNPs that share more than 80% variance. Two polygene tests were carried out. The first scored the result from any antidepressant analysis in NEWMEDS to predict in STAR\*D. The second scored the results from the serotonergic antidepressant analysis in NEWMEDS to predict in STAR\*D. The resulting datasets for both included 142,492 SNPs. Thirteen scores were calculated based on progressive p-value thresholds ( $p < 0.001, 0.01, 0.05, 0.1, 0.2, 0.3, 0.4, 0.5, 0.6, 0.7, 0.8, 0.9, \text{ and } 1.0$ ). The resulting scores were tested as predictors of improvement (percentage adjusted change, see Definition of antidepressant response phenotype Supplementary Materials section 1.4) in STAR\*D using linear regression.



## 5.2 Results

### 5.2.1 Any Antidepressant

The results from the NEWMEDS analysis including all individuals given any antidepressants (n=1790) was scored and used to predict improvement in STAR\*D (n=1107) using a linear regression. Across the thirteen different scoring bin used there was no significant prediction (Table 8).

**Table 8:** Results from the polygene scoring analysis. Progressive p-value ranges were use to score risk alleles from NEWMEDS any antidepressants to predict in STAR\*D. Scoring bin and the Range informs of the p-values included from NEWMEDS. r2 and p-value are the results from the prediction analysis in STAR\*D. r2 = proportion of variance explained.

| Scoring Bin | Range       |             | STAR*D Prediction Results |         |
|-------------|-------------|-------------|---------------------------|---------|
|             | p-value Min | p-value Max | r2                        | p-value |
| S0          | 0           | 0.0001      | 0.0017                    | 0.171   |
| S1          | 0           | 0.001       | 4.80E-06                  | 0.941   |
| S2          | 0           | 0.01        | 0.0003                    | 0.576   |
| S3          | 0           | 0.05        | 0.0005                    | 0.444   |
| S4          | 0           | 0.1         | 9.02E-05                  | 0.750   |
| S5          | 0           | 0.2         | 0.0009                    | 0.322   |
| S6          | 0           | 0.3         | 0.0017                    | 0.172   |
| S7          | 0           | 0.4         | 0.0024                    | 0.101   |
| S8          | 0           | 0.5         | 0.0024                    | 0.099   |
| S9          | 0           | 0.6         | 0.0024                    | 0.099   |
| S10         | 0           | 0.7         | 0.0024                    | 0.099   |
| S11         | 0           | 0.8         | 0.0024                    | 0.099   |
| S12         | 0           | 0.9         | 0.0024                    | 0.099   |

### 5.2.2 Serotonergic Antidepressant

Results from the NEWMEDS analysis including individual taking serotonergic antidepressants (n=1222) was scored and used to predict improvement in STAR\*D (n=1107) using a linear regression. Across the thirteen different scoring bin used there was no significant prediction (Table 9).

**Table 9:** Results from the polygene scoring analysis. Progressive p-value ranges were used to score risk alleles from NEWMEDS serotonergic antidepressants to predict in STAR\*D. Scoring bin and the Range informs of the p-values included from NEWMEDS. r2 and p-value are the results from the prediction analysis in STAR\*D. r2 = proportion of variance explained.

| Scoring Bin | Range       |             | STAR*D Prediction Results |         |
|-------------|-------------|-------------|---------------------------|---------|
|             | p-value min | p-value max | r2                        | p-value |
| S0          | 0           | 0.0001      | 1.28E-05                  | 0.904   |
| S1          | 0           | 0.001       | 3.47E-05                  | 0.843   |
| S2          | 0           | 0.01        | 0.0014                    | 0.203   |
| S3          | 0           | 0.05        | 0.0008                    | 0.344   |
| S4          | 0           | 0.1         | 2.63E-06                  | 0.957   |
| S5          | 0           | 0.2         | 0.0005                    | 0.437   |
| S6          | 0           | 0.3         | 0.0007                    | 0.383   |
| S7          | 0           | 0.4         | 0.0005                    | 0.442   |
| S8          | 0           | 0.5         | 0.0006                    | 0.397   |
| S9          | 0           | 0.6         | 0.0012                    | 0.251   |
| S10         | 0           | 0.7         | 0.0013                    | 0.220   |
| S11         | 0           | 0.8         | 0.0014                    | 0.209   |
| S12         | 0           | 0.9         | 0.0014                    | 0.217   |

## 6 Study level meta-analysis between the samples in NEWMEDS

In the main paper, an individual data analysis was undertaken bringing together data from five studies. We further conducted the analyses in each individual study (GenDep, GenPod, GODS, Pfizer, Glaxo-Smith Kline) and meta-analysed the results. The results of the meta-analysis are presented here, and compared to the results from the individual data analysis.

### 6.1 Individual study results (QQ plots)

Samples varied in size with post genotype quality control samples being: GenDep n=798, GenPod n=477, Pfizer n=311, Glaxo-Smith Kline n=132, and GODS n=73. Linear regressions were undertaken in each study separately to test for association in 520,978 SNPs on adjusted percentage change in depression severity under an additive genetic model implemented in PLINK [13]. To replicate the analytical plan, three meta-analyses were done. The first analysis was a linear regression undertaken in

each of the individual studies, and included all individuals. The second linear regression was undertaken only on individuals given SRI antidepressants, which included all of Pfizer (n=311), Glaxo-Smith Kline (n=132) and GODS (n=73), and part of GenDep (n=464) and GenPod (n=242). The third linear regression was undertaken only in individuals taking noradrenergic antidepressant, which only included part of GenDep (n=333) and GenPod (n=235). Linear regressions were run under the same conditions as in the individual data analysis. In brief, the outcome was adjusted percentage change in depression severity with four covariates to control for population stratification as highlighted in the EIGENSTRAT analysis.

Analyses undertaken in individual studies showed a uniform distribution of p-values with no inflation in the test statistic (Figure 1, Figure 2 and Table 10). Only GenDep and GenPod samples are shown for the serotonergic specific analysis, as the entire sample and serotonergic specific samples for Pfizer, Glaxo-Smith Kline and GODS are the same.

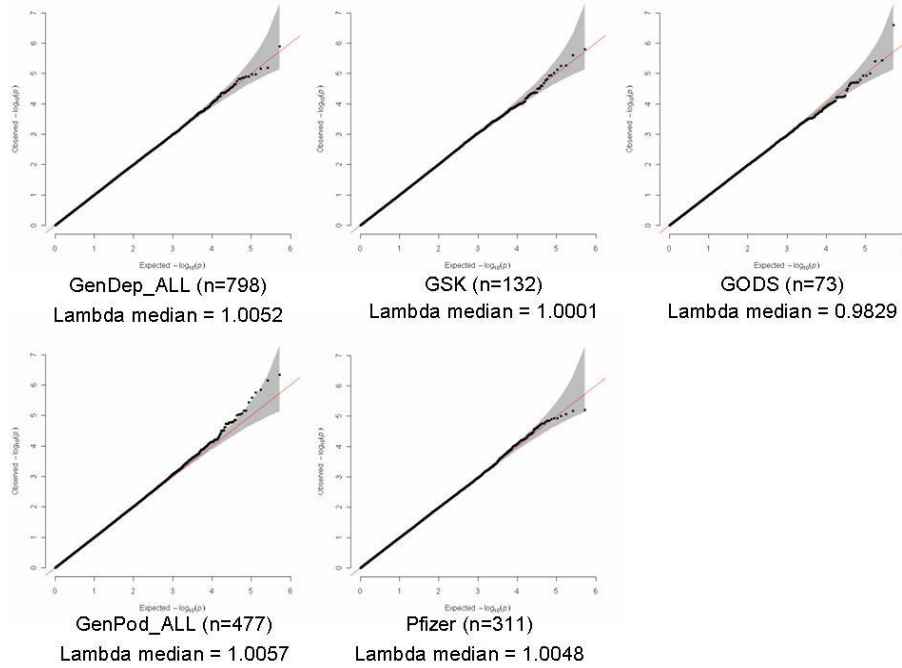

**Figure 1:** Quantile-quantile plots from the genome-wide linear regression analyses undertaken on the five samples separately. All individuals were included from the five separate samples for this analysis. Each sample shows a uniform distribution of p-values with no major deviation in the median lambda statistic.

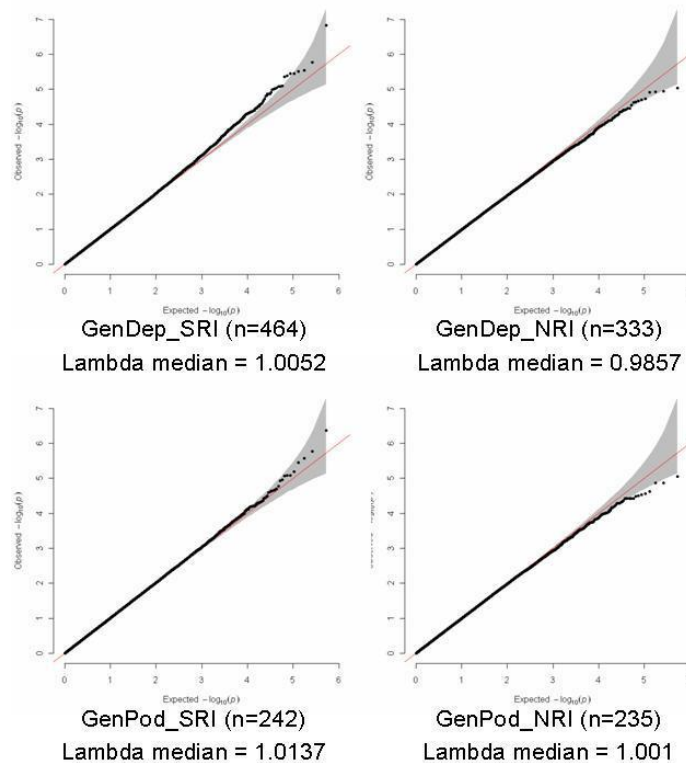

**Figure 2:** Quantile-quantile plots from the genome-wide linear regression analyses undertaken in the samples with two drugs differing on mechanism of action (serotonergic versus noradrenergic). Each sample shows a uniform distribution of p-values with no major deviation in the median lambda statistic.

**Table 10:** Median lambda values for the analyses undertaken in the five separate studies.

| <u>Study</u>      | <u>Analysis</u>            | <u>n</u> | <u>Median Lambda</u> |
|-------------------|----------------------------|----------|----------------------|
| GenDep            | Entire Sample              | 798      | 1.0052               |
| GenDep            | SRI only                   | 464      | 1.0052               |
| GenDep            | NRI only                   | 333      | 0.9857               |
| GenPod            | Entire Sample              | 477      | 1.0057               |
| GenPod            | SRI only                   | 242      | 1.0137               |
| GenPod            | NRI only                   | 235      | 1.001                |
| Pfizer            | Entire Sample/<br>SRI only | 311      | 1.0048               |
| Glaxo-Smith Kline | Entire Sample/<br>SRI only | 132      | 1.0001               |
| GODS              | Entire Sample/<br>SRI only | 73       | 0.9829               |

## 6.2 Study level meta-analysis method

Study level meta-analyses were undertaken using the ‘*meta*’ command in PLINK [13]. Results presented are for fixed effects, unless the marker showed high heterogeneity between studies judged from two test of heterogeneity, Cochran’s Q statistic and  $I^2$  heterogeneity index. Standard errors for the meta-analyses were calculated as the inverse sum of the individual studies variance divided by the square root of the number of informative individual studies.

## 6.3 Results

### 6.3.1 Study level meta-analysis of response to any antidepressant (n=1790)

Results from the study level meta-analysis were compared to the results from the individual data level analysis reported in the main part of the paper. Correlation between the analysis undertaken in the main section of the manuscript and the study level meta-analysis using fixed effects outcomes was Pearson’s correlation=0.981609 (-log<sub>10</sub> p-values) and Spearman’s = 0.9650631 (-log<sub>10</sub> p-values) (Figure 3).

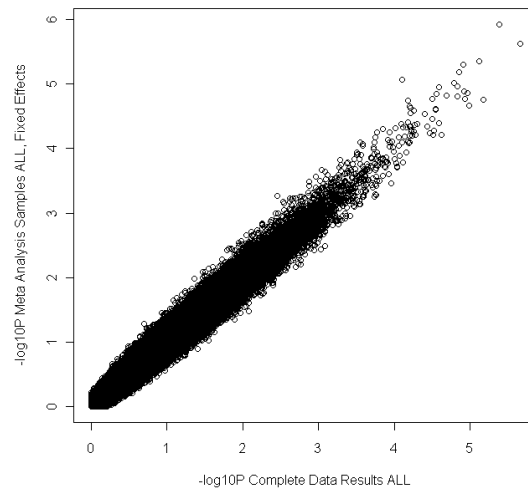

**Figure 3:** Plot of  $-\log_{10}$  P-values. The x-axis is the results from the individual data analysis in the entire sample reported in the main paper. The y-axis is the study level meta-analysis results for fixed effects.

SNPs with p-values below the suggestive evidence threshold of  $p < 5 \times 10^{-6}$  are shown in Table 11, along with those SNPs regression coefficient, standard error and p-values from individual studies and the individual data analysis from the main part of the paper. Cochran's Q statistic for all four SNPs at the suggestive level in the study level meta-analysis was not significant and had  $I^2$  indices of below 0.2, indicating no major heterogeneity between the studies. Thus the results presented here are for the fixed effects from these SNPs. Of the four SNPs below the suggestive significance level for the study level meta-analysis, two had reached the suggestive significance level in the individual data analysis presented in the main part of the paper (rs10818702 study level meta-analysis fixed effects  $p = 2.38 \times 10^{-6}$ , individual data analysis  $p = 2.19 \times 10^{-6}$  and rs11624702 study level meta-analysis fixed effects  $p = 1.18 \times 10^{-6}$ , individual data analysis  $p = 4.08 \times 10^{-6}$ ). The other two SNPs were strongly associated in the individual data analysis but failed to reach the suggestive evidence cut-off.

**Table 11:** Study level meta-analysis (referred to as META below) results for SNPs with p-values below the suggestive significance level of  $5 \times 10^{-6}$  for fixed effects meta-analysis for the adjusted percentage change in depression severity in the entire sample of antidepressant treated individuals under an additive genetic model. Regression coefficient is standardized and can be interpreted as a measure of effect size: it is the number of standard deviations in outcome per minor allele. Positive values of regression coefficient mean that carriers of more minor alleles had better treatment outcome. Negative values of regression coefficient mean that carriers of more minor alleles had worse outcomes.

| CHR | Position  | SNP        | AI | Study                    | N                | p-value         | Regression    | SE    |
|-----|-----------|------------|----|--------------------------|------------------|-----------------|---------------|-------|
| 2   | 65084243  | rs3770705  | G  | <b>META</b>              | <b>5 Studies</b> | <b>4.37E-06</b> | <b>0.168</b>  |       |
|     |           |            |    | GenDep                   | 793              | 2.83E-05        | 0.224         | 0.053 |
|     |           |            |    | GenPod                   | 473              | 8.54E-02        | 0.124         | 0.072 |
|     |           |            |    | GODS                     | 73               | 8.51E-01        | 0.073         | 0.387 |
|     |           |            |    | Pfizer                   | 309              | 4.29E-01        | 0.068         | 0.086 |
|     |           |            |    | GSK                      | 131              | 9.54E-02        | 0.226         | 0.135 |
|     |           |            |    | Individual data analysis | 1779             | 7.49E-06        | 0.162         | 0.038 |
| 9   | 38629318  | rs12340088 | C  | <b>META</b>              | <b>5 Studies</b> | <b>4.97E-06</b> | <b>0.199</b>  |       |
|     |           |            |    | GenDep                   | 794              | 1.11E-02        | 0.165         | 0.065 |
|     |           |            |    | GenPod                   | 477              | 1.43E-03        | 0.261         | 0.081 |
|     |           |            |    | GODS                     | 73               | 9.95E-01        | 0.002         | 0.414 |
|     |           |            |    | Pfizer                   | 311              | 8.92E-02        | 0.172         | 0.101 |
|     |           |            |    | GSK                      | 132              | 1.16E-01        | 0.274         | 0.173 |
|     |           |            |    | Individual data analysis | 1787             | 1.24E-05        | 0.185         | 0.042 |
| 9   | 124285545 | rs10818702 | A  | <b>META</b>              | <b>5 studies</b> | <b>2.38E-06</b> | <b>-0.193</b> |       |
|     |           |            |    | GenDep                   | 797              | 4.38E-03        | -0.168        | 0.059 |
|     |           |            |    | GenPod                   | 476              | 2.59E-03        | -0.242        | 0.080 |
|     |           |            |    | GODS                     | 73               | 3.91E-01        | -0.355        | 0.411 |
|     |           |            |    | Pfizer                   | 311              | 4.72E-03        | -0.282        | 0.099 |
|     |           |            |    | GSK                      | 132              | 7.78E-01        | 0.0423        | 0.150 |
|     |           |            |    | Individual data analysis | 1789             | 2.19E-06        | -0.190        | 0.040 |
| 14  | 46588187  | rs11624702 | A  | <b>META</b>              | <b>5 studies</b> | <b>1.18E-06</b> | <b>0.162</b>  |       |
|     |           |            |    | GenDep                   | 797              | 5.58E-04        | 0.166         | 0.048 |
|     |           |            |    | GenPod                   | 477              | 1.48E-02        | 0.158         | 0.064 |
|     |           |            |    | GODS                     | 73               | 9.98E-01        | -0.001        | 0.391 |
|     |           |            |    | Pfizer                   | 311              | 1.87E-01        | 0.108         | 0.082 |
|     |           |            |    | GSK                      | 132              | 2.19E-02        | 0.274         | 0.118 |
|     |           |            |    | Individual data analysis | 1790             | 4.08E-06        | 0.151         | 0.033 |

### 6.3.1.1 Forest plot of top results from the study level meta-analysis

Figures 4 through 7 are forest plots for the SNPs which reached the genome wide suggestive level of  $p < 5 \times 10^{-6}$  in the study level meta-analysis undertaken for response to any antidepressant (n=1790).

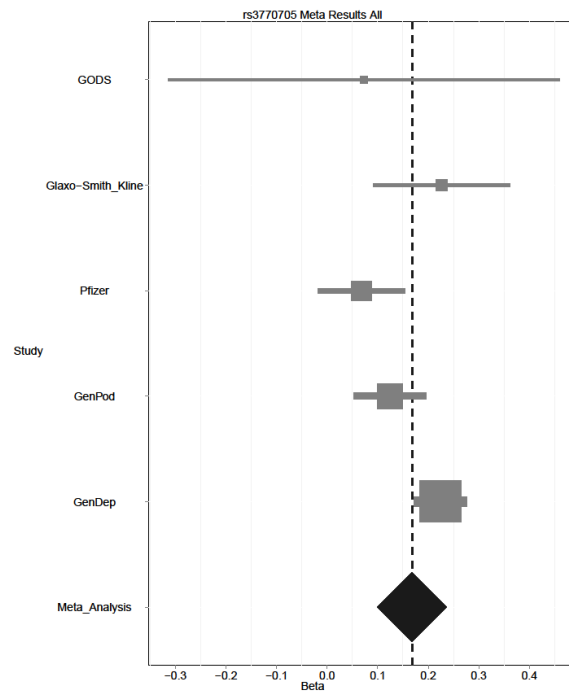

**Figure 4:** Forest plot for rs3770705. Results from the five individual studies are shown with lines representing 95% confidence intervals and boxes indicating individual study effect size. The black line is the beta value from the study level meta-analysis referred to as “Meta\_Analysis” above.



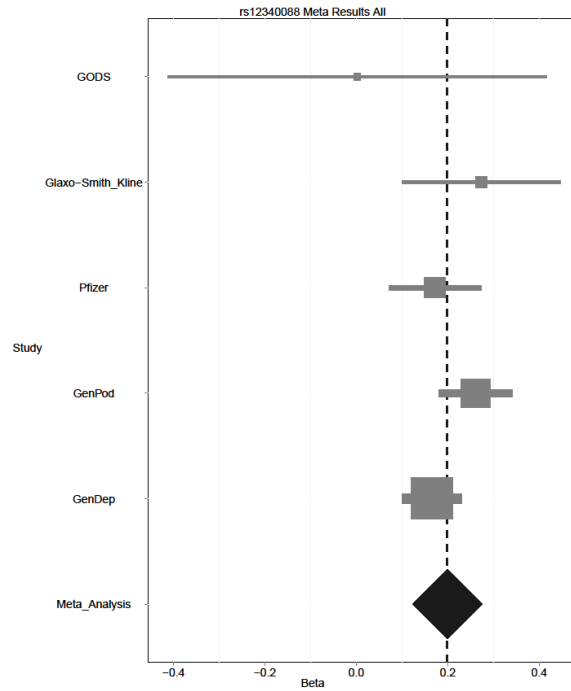

**Figure 5:** Forest plot for rs12340088. Results from the five individual studies are shown with lines representing 95% confidence intervals and boxes indicating individual study effect size. The black line is the beta value from the study level meta-analysis referred to as “Meta\_Analysis” above.

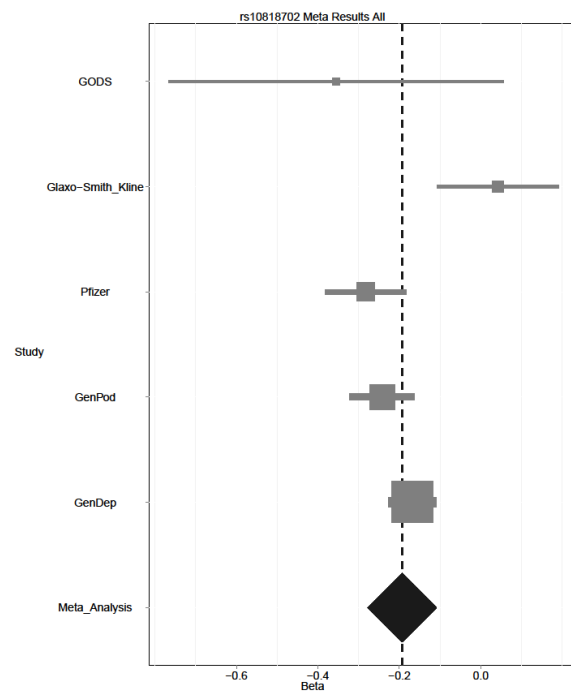

**Figure 6:** Forest plot for rs10818702. Results from the five individual studies are shown with lines representing 95% confidence intervals and boxes indicating individual study effect size. The black line is the beta value from the study level meta-analysis referred to as “Meta\_Analysis” above.

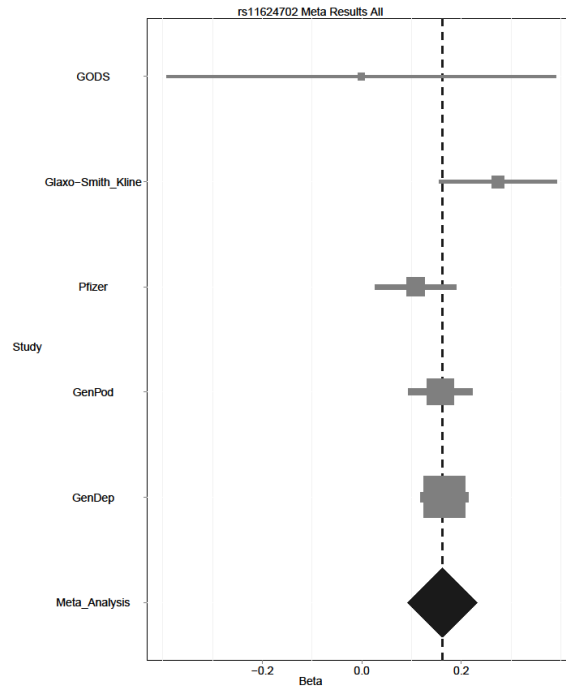

**Figure 7:** Forest plot for rs11624702. Results from the five individual studies are shown with lines representing 95% confidence intervals and boxes indicating individual study effect size. The black line is the beta value from the study level meta-analysis referred to as “Meta\_Analysis” above.

### 6.3.2 Study level meta-analysis of response to SRIs (n=1222)

Study level meta-analysis from the five individual studies for individuals given serotonergic antidepressants was undertaken using PLINK [13]. This analysis included all individuals from the Pfizer, Glaxo-Smith Kline and GODS studies as well as some individuals from GenDep (n=464) and GenPod (n=242) studies. Results from the study level meta-analysis were compared to the results from the individual data analysis reported for individuals given serotonergic antidepressants in the main part of the paper. Correlation between the individual data analysis and the study level meta-analysis in the individuals taking serotonergic antidepressants using fixed effects outcomes was Pearson’s correlation = 0.9692422 (-log<sub>10</sub> p-values) and Spearman’s = 0.9445827 (-log<sub>10</sub> p-values) (Figure 8).

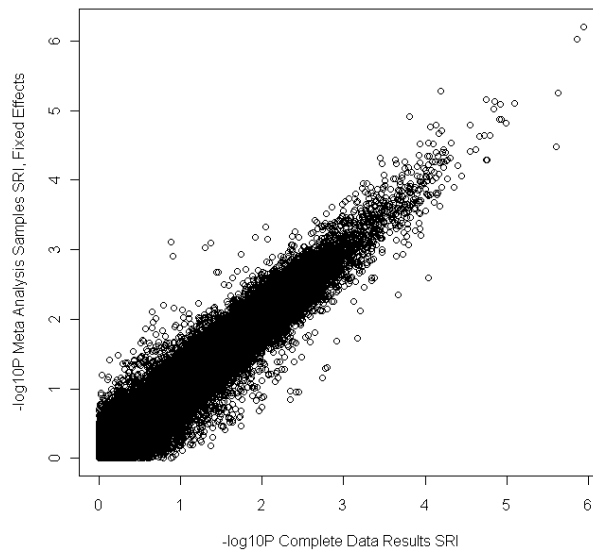

**Figure 8:** Plot of  $-\log_{10}$  P-values. The x-axis is the results from the individual data analysis for individuals on serotonergic antidepressants reported in the main paper. The y-axis is the study level meta-analysis results for fixed effects for individuals from the five studies taking serotonergic antidepressants.

SNPs with p-values below the suggestive evidence threshold of  $p < 5 \times 10^{-6}$  are shown in Table 12, along with those SNPs regression coefficient, standard error and p-values from individual studies and the individual data analysis from the main part of the paper. Cochran's Q statistic for both SNPs at the suggestive level in the study level meta-analysis was not significant and had  $I^2$  indices of 0, indicating no heterogeneity between the studies. Thus the results presented here are for the fixed effects from these SNPs. Both SNPs were also associated in the individual data analysis presented in the main part of the paper below the suggestive evidence threshold ( $p < 5 \times 10^{-6}$ ).

**Table 12:** Study level meta-analysis (referred to as META below) results for the adjusted percentage change in depression severity in SRI-treated individuals under an additive genetic model. SNPs reported had p-values below the suggestive significance level of  $5 \times 10^{-6}$  for fixed effects meta-analysis. Regression coefficient is standardized and can be interpreted as a measure of effect size: it is the number of standard deviations in outcome per minor allele. Positive values of regression coefficient mean that carriers of more minor alleles had better treatment outcome. Negative values of regression coefficient mean that carriers of more minor alleles had worse outcomes.

| CHR | BP        | SNP        | A1 | Study                    | N                | p-value         | Regression Coefficient | SE    |
|-----|-----------|------------|----|--------------------------|------------------|-----------------|------------------------|-------|
| 5   | 164692074 | rs10515893 | A  | <b>META</b>              | <b>5 studies</b> | <b>9.30E-07</b> | <b>-0.221</b>          |       |
|     |           |            |    | GenDep                   | 464              | 3.13E-02        | -0.155                 | 0.072 |
|     |           |            |    | GenPod                   | 242              | 5.53E-02        | -0.199                 | 0.103 |
|     |           |            |    | GODS                     | 73               | 4.01E-01        | -0.356                 | 0.421 |
|     |           |            |    | Pfizer                   | 311              | 4.02E-04        | -0.303                 | 0.085 |
|     |           |            |    | GSK                      | 132              | 4.25E-02        | -0.262                 | 0.128 |
|     |           |            |    | Individual data analysis | 1222             | 1.37E-06        | -0.223                 | 0.048 |
| 12  | 47433214  | rs10783282 | A  | <b>META</b>              | <b>5 studies</b> | <b>6.17E-07</b> | <b>-0.251</b>          |       |
|     |           |            |    | GenDep                   | 464              | 1.99E-04        | -0.294                 | 0.079 |
|     |           |            |    | GenPod                   | 242              | 4.60E-01        | -0.089                 | 0.121 |
|     |           |            |    | GODS                     | 73               | 2.98E-01        | -0.501                 | 0.478 |
|     |           |            |    | Pfizer                   | 311              | 6.34E-04        | -0.317                 | 0.092 |
|     |           |            |    | GSK                      | 132              | 4.04E-01        | -0.132                 | 0.158 |
|     |           |            |    | Individual data analysis | 1222             | 1.16E-06        | -0.247                 | 0.054 |

### 6.3.2.1 Forest plot of top results from the study level meta-analysis

Figures 9 and 10 are forest plots for the SNPs which reached the genome wide suggestive level of  $p < 5 \times 10^{-6}$  in the study level meta-analysis undertaken for response to serotonergic antidepressant (n=1222).

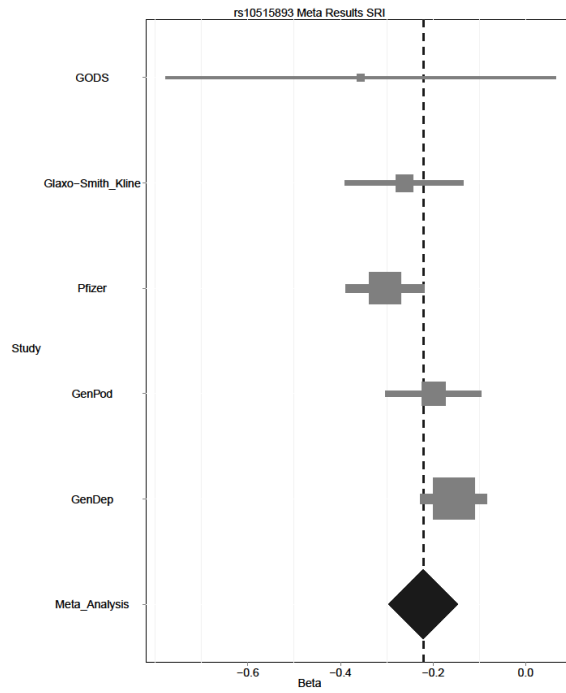

**Figure 9:** Forest plot for rs10515893. Results from the five individual studies are shown with lines representing 95% confidence intervals and boxes indicating individual study effect size. The black line is the beta value from the study level meta-analysis referred to as “Meta\_Analysis” above.

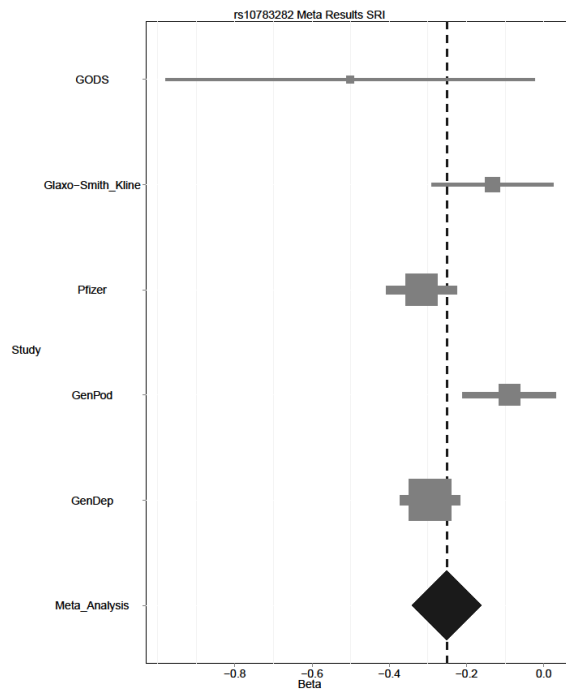

**Figure 10:** Forest plot for rs10783282. Results from the five individual studies are shown with lines representing 95% confidence intervals and boxes indicating individual study effect size. The black line is the beta value from the study level meta-analysis referred to as “Meta\_Analysis” above.

### 6.3.3 Study level meta-analysis of response to NRIs (n=568)

Study level meta-analysis from the two studies with individuals given noradrenergic antidepressants was undertaken using PLINK [13]. This analysis included only some individuals from GenDep (n=333) and GenPod (n=235) studies. Results from the study level meta-analysis were compared to the results from the individual data analysis reported for individuals given noradrenergic antidepressants in the main part of the paper. Correlation between the individual data analysis and study level meta-analysis in the entire sample using fixed effects outcomes was Pearson's correlation = 0.9953033 (-log<sub>10</sub> p-values) and Spearman's = 0.9909853 (-log<sub>10</sub> p-values) (Figure 11).

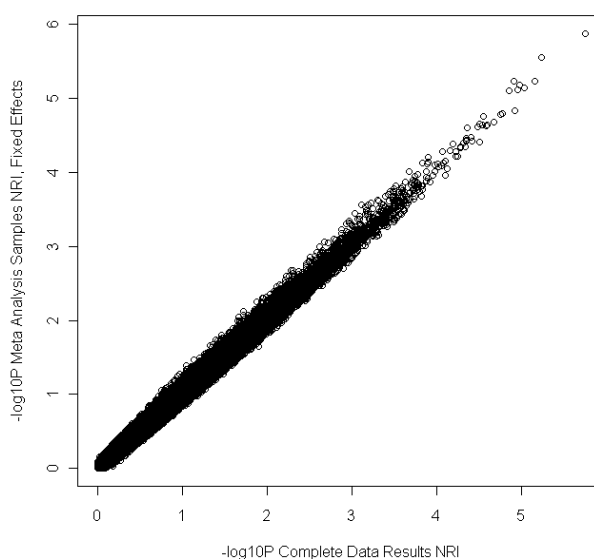

**Figure 11:** Plot of -log<sub>10</sub> P-values. The x-axis is the results from the individual data analysis for individuals on noradrenergic antidepressants reported in the main paper. The y-axis is the study level meta-analysis results for fixed effects for individuals from the two studies given noradrenergic antidepressants.

SNPs with p-values below the suggestive evidence threshold of  $p < 5 \times 10^{-6}$  are shown in Table 13, along with those SNPs regression coefficient, standard error and p-values from individual studies and the individual data analysis from the main part of the

paper. Cochran's Q statistic for all three SNPs at the suggestive level in the study level meta-analysis was not significant and had  $I^2$  indices of 0, indicating no heterogeneity between the studies. Thus the results presented here are for the fixed effects from these SNPs. Two SNPs from the study level meta-analysis were the two SNPs associated in the individual data analysis below the suggestive evidence threshold ( $p < 5 \times 10^{-6}$ ) presented in the main part of the paper. The third SNP at the suggestive level in the study level meta-analysis was associated in the individual data analysis just under the significance threshold ( $5.83 \times 10^{-6}$ , rs17810534).

**Table 13:** Study level meta-analysis (referred to as META below) results for the adjusted percentage change in depression severity in SRI-treated individuals under an additive genetic model. SNPs reported had p-values below the suggestive significance level of  $5 \times 10^{-6}$  for fixed effects meta-analysis. Regression coefficient is standardized and can be interpreted as a measure of effect size: it is the number of standard deviations in outcome per minor allele. Positive values of regression coefficient mean that carriers of more minor alleles had better treatment outcome. Negative values of regression coefficient mean that carriers of more minor alleles had worse outcomes.

| CHR | BP        | SNP        | A1 | Study                    | N                | p-value         | Regression Coefficient | SE    |
|-----|-----------|------------|----|--------------------------|------------------|-----------------|------------------------|-------|
| 6   | 129928992 | rs17810534 | G  | <b>META</b>              | <b>2 studies</b> | <b>2.80E-06</b> | <b>-0.368</b>          |       |
|     |           |            |    | GenDep                   | 332              | 1.19E-05        | -0.412                 | 0.093 |
|     |           |            |    | GenPod                   | 234              | 8.61E-02        | -0.255                 | 0.148 |
|     |           |            |    | Individual data analysis | 566              | 5.83E-06        | -0.360                 | 0.079 |
| 7   | 27676198  | rs13237776 | A  | <b>META</b>              | <b>2 studies</b> | <b>1.32E-06</b> | <b>-0.338</b>          |       |
|     |           |            |    | GenDep                   | 333              | 1.48E-04        | -0.324                 | 0.084 |
|     |           |            |    | GenPod                   | 235              | 3.42E-03        | -0.370                 | 0.125 |
|     |           |            |    | Individual data analysis | 568              | 1.77E-06        | -0.336                 | 0.070 |
| 7   | 27677080  | rs12534474 | A  | <b>META</b>              | <b>2 studies</b> | <b>1.32E-06</b> | <b>-0.338</b>          |       |
|     |           |            |    | GenDep                   | 333              | 1.48E-04        | -0.324                 | 0.084 |
|     |           |            |    | GenPod                   | 235              | 3.42E-03        | -0.370                 | 0.125 |
|     |           |            |    | Individual data analysis | 568              | 1.77E-06        | -0.336                 | 0.070 |

### 6.3.3.1 Forest plot of top results from the study level meta-analysis

Figures 12 through 15 are forest plots for the SNPs which reached the genome wide suggestive level of  $p < 5 \times 10^{-6}$  in the study level meta-analysis undertaken for response to noradrenergic antidepressant (n=568).

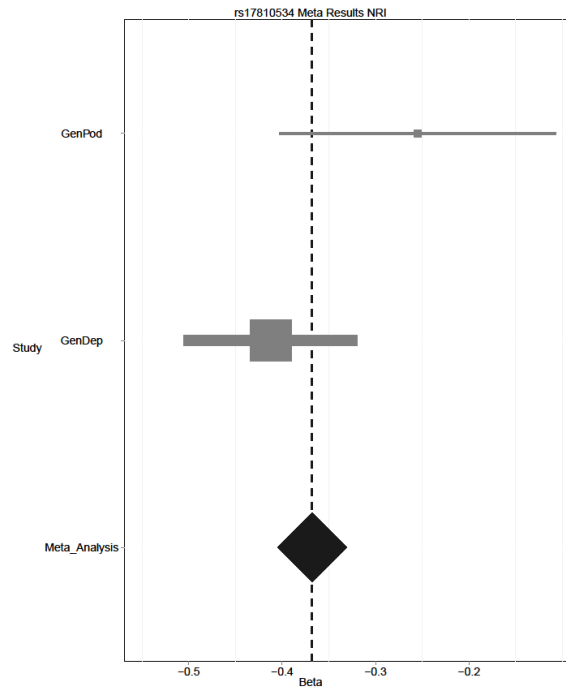

**Figure 12:** Forest plot for rs17810534. Results from the five individual studies are shown with lines representing 95% confidence intervals and boxes indicating individual study effect size. The black line is the beta value from the study level meta-analysis referred to as “Meta\_Analysis” above.



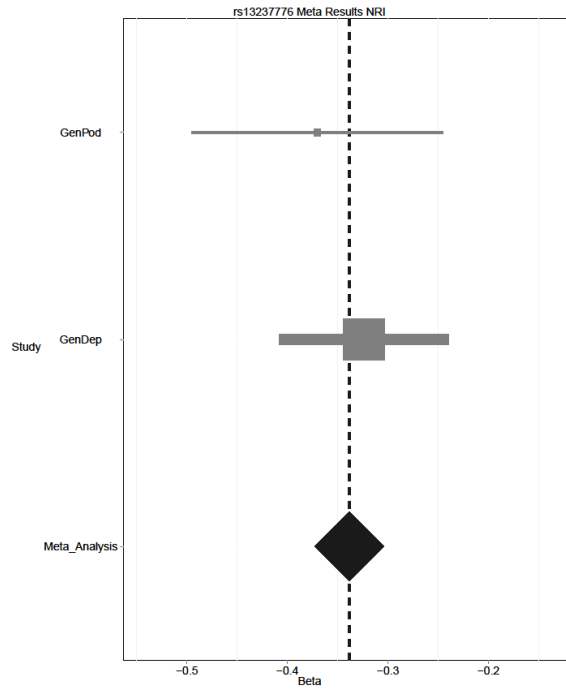

**Figure 13:** Forest plot for rs13237776. Results from the five individual studies are shown with lines representing 95% confidence intervals and boxes indicating individual study effect size. The black line is the beta value from the study level meta-analysis referred to as “Meta\_Analysis” above.

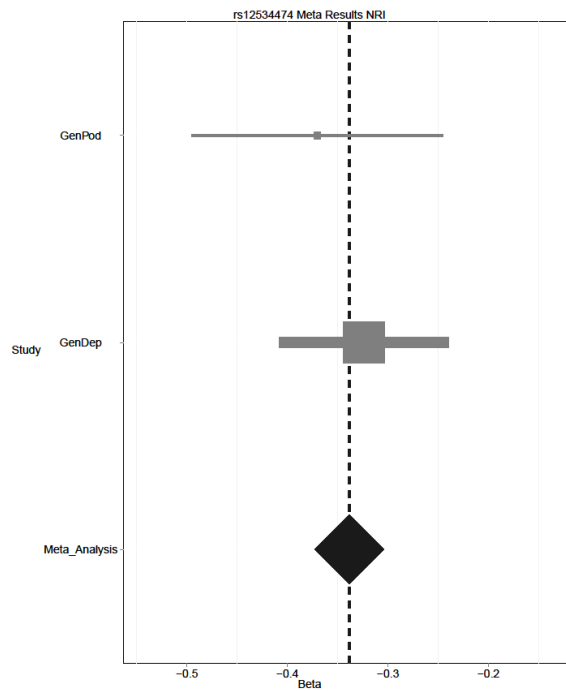

**Figure 14:** Forest plot for rs12534474. Results from the five individual studies are shown with lines representing 95% confidence intervals and boxes indicating individual study effect size. The black line is the beta value from the study level meta-analysis referred to as “Meta\_Analysis” above.

## 7 Candidate gene analysis in NEWMEDS

### 7.1 Exploration of candidate genes

We extracted 3,802 markers located within the coding region and 20kb window 5' and 3' of the coding region of 118 candidate genes, selected based on recent literature reviews on antidepressant pharmacogenetics [22,60,65-67], and implicated in antidepressant action, or aetiology of mental illness. Top associations from the four analyses are reported.

### 7.2 Results

None of the 3,802 markers in 118 candidate genes were significantly associated with outcome after correction for multiple testing (Bonferroni-corrected  $p$  value= $1.3 \times 10^{-5}$ ). The strongest associations with response to any antidepressant in the whole sample were within *GRIK3* (rs11801494  $p=1.97 \times 10^{-4}$ ), *GRIK4* (rs4445646  $p=8.45 \times 10^{-4}$ ) and *PDE9A* (rs2245730  $p=8.77 \times 10^{-4}$ ). In the drug-specific analyses, *GRIK1* (rs363512  $p=3.3 \times 10^{-4}$ ) and *UST* (rs2500535  $p=6.41 \times 10^{-4}$ ) were the most interesting results for NRI response, and *HTR4* (rs1833704  $p=4.97 \times 10^{-4}$ ), *GRIK4* (rs4445646  $p=7.46 \times 10^{-4}$ ) and *ZNF804A* (rs2369595  $p=9.32 \times 10^{-4}$ ) were associated with SRI response. For differential response to SRI and NRI antidepressants, the top results were in *NTRK2* (rs7875184  $p=0.0008$ ), *CLOCK* (rs1522113  $p=0.0011$ ), *PRKCH* (rs1033908  $p=0.0015$ ) and *NEGR1* (rs6683448  $p=0.0018$ ).

A full list of top SNP for each gene tested for association in the candidate gene analysis can be found in Table 14 for response to any antidepressant ( $n=1790$ ), Table 15 for response to serotonergic antidepressants ( $n=1222$ ), Table 16 for response to noradrenergic antidepressants ( $n=568$ ), and Table 17 for gene by drug interaction results.

**Table 14:** Candidate gene results from analysis of SNP markers on the adjusted percentage change in depression severity in the whole sample of 1790 antidepressant-treated individuals. Only the top associated SNP is shown each gene. Regression coefficient is standardized and can be interpreted as a measure of effect size: it is the number of standard deviations in outcome per minor allele. Positive values of regression coefficient mean that carriers of more minor alleles had better treatment outcome. Negative values of regression coefficient mean that carriers of more minor alleles had worse outcomes.

|             |                       | Entire Sample (n=1790) |                        |         |         |
|-------------|-----------------------|------------------------|------------------------|---------|---------|
| Gene symbol | Number of SNPs tested | Top SNP                | Regression Coefficient | SE      | p-Value |
| ABCB1       | 59                    | rs6946119              | 0.0490                 | 0.0381  | 0.1948  |
| ACE         | 11                    | rs4459609              | 0.0920                 | 0.0336  | 0.0064  |
| ADRA1A      | 67                    | rs2291776              | -0.1880                | 0.0652  | 0.0039  |
| ADRA1B      | 21                    | rs10053468             | -0.1310                | 0.0656  | 0.0454  |
| ADRA2A      | 8                     | rs7908645              | 0.0370                 | -0.0309 | 0.3986  |
| ADRA2B      | 5                     | rs749457               | -0.0090                | 0.0340  | 0.7968  |
| ADRA2C      | 5                     | rs12506413             | -0.0970                | 0.0424  | 0.0234  |
| ADRB1       | 16                    | rs4917675              | 0.1090                 | 0.0386  | 0.0049  |
| AKT1        | 4                     | rs4983387              | 0.0810                 | 0.0499  | 0.1043  |
| ANK3        | 118                   | rs12355908             | -0.0790                | 0.0374  | 0.0353  |
| ANKK1       | 15                    | rs877138               | -0.0840                | 0.0351  | 0.0168  |
| AVPR1A      | 10                    | rs7308008              | 0.0880                 | 0.0480  | 0.0678  |
| AVPR1B      | 5                     | rs28425623             | 0.0330                 | 0.0511  | 0.5146  |
| AVPR2       | 5                     | rs4898457              | -0.0420                | 0.0418  | 0.3185  |
| BDNF        | 14                    | rs7934165              | 0.0330                 | 0.0772  | 0.0176  |
| CACNA1C     | 191                   | rs2239037              | -0.1010                | 0.0328  | 0.0020  |
| CCL28       | 9                     | rs779850               | 0.0760                 | 0.0426  | 0.0775  |
| CD3E        | 6                     | rs2277289              | -0.1040                | 0.0354  | 0.0034  |
| CLOCK       | 10                    | rs11932595             | 0.0640                 | 0.0335  | 0.0576  |
| CNR1        | 22                    | rs806368               | 0.1130                 | 0.0404  | 0.0053  |
| COMT        | 28                    | rs165599               | 0.0970                 | 0.0359  | 0.0069  |
| CREB1       | 7                     | rs2194430              | -0.0790                | 0.1002  | 0.4308  |
| CRHR1       | 22                    | rs12185268             | 0.0730                 | 0.0393  | 0.0633  |
| CRHR2       | 19                    | rs24003                | -0.0550                | 0.0336  | 0.1043  |
| CXCR4       | 8                     | rs12691874             | 0.0540                 | 0.0331  | 0.1054  |
| DRD1        | 23                    | rs11954565             | -0.0550                | 0.0338  | 0.1040  |
| DRD2        | 29                    | rs2734849              | -0.0750                | 0.0336  | 0.0251  |
| DRD3        | 23                    | rs6787134              | 0.0690                 | 0.0471  | 0.1422  |
| DRD4        | 6                     | rs7932167              | -0.0470                | 0.0390  | 0.2307  |

|        |     |            |         |         |        |
|--------|-----|------------|---------|---------|--------|
| DRD5   | 3   | rs1533615  | 0.1020  | 0.0790  | 0.1969 |
| DTNBP1 | 31  | rs9396593  | -0.0840 | 0.0385  | 0.0288 |
| EDNRB  | 5   | rs9544635  | -0.0710 | 0.0562  | 0.2034 |
| FGFR1  | 13  | rs13317    | 0.0610  | 0.0385  | 0.1153 |
| FGFR2  | 33  | rs4752566  | 0.0610  | 0.0329  | 0.0662 |
| FGFR3  | 1   | rs743682   | -0.0760 | 0.0574  | 0.1881 |
| FGFR4  | 4   | rs451643   | 0.0500  | 0.0355  | 0.1594 |
| FKBP5  | 22  | rs10456432 | -0.0580 | 0.0414  | 0.1602 |
| FLT1   | 42  | rs10507385 | -0.0640 | 0.0366  | 0.0830 |
| FTO    | 97  | rs17219084 | 0.0790  | 0.0337  | 0.0203 |
| GNAS   | 16  | rs234623   | 0.0910  | 0.0333  | 0.0062 |
| GNB3   | 16  | rs5439     | -0.1260 | 0.0561  | 0.0249 |
| GNPDA2 | 2   | rs12640665 | 0.1300  | 0.0675  | 0.0546 |
| GRIA1  | 94  | rs11746246 | 0.1690  | 0.0496  | 0.1692 |
| GRIA2  | 9   | rs10025251 | 0.0630  | -0.0776 | 0.0630 |
| GRIA3  | 60  | rs5911623  | 0.0200  | -0.0880 | 0.0202 |
| GRIA4  | 57  | rs17391295 | 0.0050  | 0.1705  | 0.0050 |
| GRIK1  | 116 | rs462606   | 0.0070  | -0.1155 | 0.0068 |
| GRIK2  | 159 | rs6926170  | 0.0110  | 0.0837  | 0.0112 |
| GRIK3  | 31  | rs11801494 | 0.0001  | 0.2095  | 0.0002 |
| GRIK4  | 107 | rs4445646  | 0.0008  | 0.1157  | 0.0008 |
| GRIK5  | 5   | rs2217342  | 0.1140  | -0.0925 | 0.1139 |
| GRIN1  | 3   | rs4880094  | 0.2060  | -0.0497 | 0.2061 |
| GRIN2A | 147 | rs9928984  | 0.0760  | -0.1474 | 0.0758 |
| GRIN2B | 173 | rs10459061 | 0.0070  | 0.1980  | 0.0069 |
| GRIN2C | 5   | rs3803783  | 0.3130  | 0.0371  | 0.3126 |
| GRIN2D | 9   | rs275844   | 0.3100  | 0.0506  | 0.3102 |
| GRIN3A | 61  | rs1415644  | 0.0190  | -0.0932 | 0.0188 |
| GSK3A  | 1   | rs11878620 | 0.3720  | 0.0572  | 0.3724 |
| GSK3B  | 24  | rs11919783 | 0.0566  | -0.1035 | 0.0566 |
| HTR1A  | 2   | rs1364043  | 0.2600  | -0.0441 | 0.2603 |
| HTR1B  | 13  | rs9352483  | 0.0540  | 0.0901  | 0.0541 |
| HTR2A  | 50  | rs4942578  | 0.0020  | 0.1376  | 0.0016 |
| HTR2B  | 4   | rs13394402 | 0.0100  | 0.1116  | 0.0101 |
| HTR2C  | 15  | rs498207   | 0.1920  | 0.0500  | 0.1918 |

|        |     |            |        |         |        |
|--------|-----|------------|--------|---------|--------|
| HTR3A  | 22  | rs10891611 | 0.1070 | 0.0732  | 0.1071 |
| HTR3B  | 13  | rs3891484  | 0.1520 | -0.0672 | 0.1519 |
| HTR4   | 41  | rs2068190  | 0.0320 | 0.0714  | 0.0315 |
| HTR5A  | 14  | rs2581844  | 0.0660 | -0.1418 | 0.0655 |
| HTR6   | 16  | rs7522389  | 0.0060 | -0.1100 | 0.0055 |
| HTR7   | 22  | rs7920627  | 0.1260 | -0.1244 | 0.1256 |
| IL1B   | 11  | rs4849124  | 0.1020 | -0.0586 | 0.1020 |
| IL6    | 16  | rs7801617  | 0.0560 | 0.1045  | 0.0555 |
| KCNK2  | 45  | rs2841615  | 0.1140 | 0.0531  | 0.1142 |
| KCTD15 | 17  | rs285676   | 0.0410 | -0.1001 | 0.0408 |
| LEP    | 12  | rs10487506 | 0.0340 | 0.0711  | 0.0343 |
| LEPR   | 44  | rs10158579 | 0.0100 | -0.1274 | 0.0104 |
| MAOA   | 8   | rs6609257  | 0.2480 | 0.0426  | 0.2478 |
| MAOB   | 7   | rs6609257  | 0.2480 | 0.0426  | 0.2478 |
| MC4R   | 12  | rs12958350 | 0.1660 | 0.0467  | 0.1660 |
| MTCH2  | 3   | rs1474056  | 0.6150 | 0.0236  | 0.6151 |
| NEGR1  | 128 | rs1426179  | 0.0090 | -0.0999 | 0.0090 |
| NOS1   | 48  | rs12099598 | 0.0070 | 0.1085  | 0.0073 |
| NR3C1  | 20  | rs4912911  | 0.0760 | -0.0623 | 0.0757 |
| NTRK2  | 82  | rs7026417  | 0.0040 | 0.1646  | 0.0041 |
| OLIG1  | 8   | rs928736   | 0.1400 | -0.0528 | 0.1403 |
| OLIG2  | 14  | rs2834072  | 0.0530 | -0.0634 | 0.0533 |
| OLIG3  | 14  | rs9385796  | 0.0330 | 0.1507  | 0.0329 |
| OPRM1  | 79  | rs10223804 | 0.0380 | 0.0955  | 0.0383 |
| P2RX1  | 20  | rs6502751  | 0.1190 | 0.0873  | 0.1192 |
| P2RX2  | 7   | rs11146967 | 0.2210 | -0.0411 | 0.2211 |
| P2RX3  | 11  | rs3741089  | 0.4030 | 0.0277  | 0.4032 |
| P2RX4  | 14  | rs10774589 | 0.0870 | -0.0744 | 0.0868 |
| P2RX5  | 9   | rs3817666  | 0.2200 | 0.0986  | 0.2202 |
| P2RX6  | 21  | rs12627919 | 0.0090 | 0.1514  | 0.0090 |
| P2RX7  | 25  | rs12815078 | 0.0950 | 0.0957  | 0.0954 |
| PCLO   | 78  | rs16887353 | 0.0150 | 0.1458  | 0.0148 |
| PDE11A | 104 | rs2695109  | 0.0660 | -0.0753 | 0.0664 |
| PDE1A  | 79  | rs11690832 | 0.0190 | -0.0770 | 0.0195 |
| PDE9A  | 56  | rs2245730  | 0.0009 | -0.1118 | 0.0009 |
| PER1   | 6   | rs2253820  | 0.1640 | 0.0629  | 0.1638 |

|         |     |            |        |         |        |
|---------|-----|------------|--------|---------|--------|
| PER2    | 11  | rs7579382  | 0.0690 | 0.0611  | 0.0688 |
| PER3    | 18  | rs12566535 | 0.0300 | 0.1094  | 0.0302 |
| PRKCH   | 80  | rs6573391  | 0.0060 | 0.1690  | 0.0062 |
| PSMB4   | 4   | rs1887545  | 0.4590 | 0.0324  | 0.4589 |
| PSMD9   | 6   | rs895959   | 0.0600 | 0.0907  | 0.0596 |
| S100B   | 2   | rs2839362  | 0.1080 | 0.0967  | 0.1083 |
| SH2B1   | 2   | rs4788102  | 0.0650 | 0.0620  | 0.0646 |
| SLC6A1  | 43  | rs11719708 | 0.0160 | 0.0799  | 0.0160 |
| SLC6A2  | 33  | rs187715   | 0.0050 | -0.2086 | 0.0050 |
| SLC6A3  | 24  | rs11133767 | 0.0230 | -0.0808 | 0.0232 |
| SLC6A4  | 14  | rs2066713  | 0.0040 | 0.0988  | 0.0035 |
| STAT3   | 10  | rs17405722 | 0.1880 | 0.0936  | 0.1875 |
| TBX21   | 5   | rs7502875  | 0.0280 | 0.0880  | 0.0284 |
| TMEM18  | 21  | rs6728479  | 0.1110 | -0.0929 | 0.1117 |
| TPH1    | 8   | rs11024449 | 0.0680 | 0.0699  | 0.0677 |
| TPH2    | 34  | rs5019656  | 0.0760 | 0.1013  | 0.0761 |
| UST     | 134 | rs2500535  | 0.0020 | -0.2284 | 0.0023 |
| ZNF804A | 31  | rs2369595  | 0.0140 | -0.1023 | 0.0140 |

**Table 15:** Candidate gene results from the analysis between SNP markers and adjusted percentage change in depression severity in 1222 SRI-treated individuals. Only the top associated SNP is shown from each gene. Regression coefficient is standardized and can be interpreted as a measure of effect size: it is the number of standard deviations in outcome per minor allele. Positive values of regression coefficient mean that carriers of more minor alleles had better treatment outcome. Negative values of regression coefficient mean that carriers of more minor alleles had worse outcomes.

| Gene Symbol | Number of SNPs tested | Serotonergic Antidepressant Analysis (n=1222) |                        |         |         |
|-------------|-----------------------|-----------------------------------------------|------------------------|---------|---------|
|             |                       | Top SNP                                       | Regression Coefficient | SE      | p-Value |
| ABCB1       | 59                    | rs2235074                                     | 0.0815                 | -0.1731 | 0.0993  |
| ACE         | 11                    | rs4459609                                     | 0.0013                 | 0.1315  | 0.0407  |
| ADRA1A      | 67                    | rs11779546                                    | 0.0042                 | -0.1446 | 0.0504  |
| ADRA1B      | 21                    | rs6874816                                     | 0.0251                 | -0.1257 | 0.0560  |
| ADRA2A      | 8                     | rs491589                                      | 0.1910                 | 0.0729  | 0.0557  |
| ADRA2B      | 5                     | rs749457                                      | 0.2389                 | -0.0492 | 0.0418  |
| ADRA2C      | 5                     | rs4916612                                     | 0.0078                 | -0.1832 | 0.0687  |
| ADRB1       | 16                    | rs740746                                      | 0.0124                 | -0.1122 | 0.0448  |
| AKT1        | 4                     | rs4983387                                     | 0.1599                 | 0.0843  | 0.0599  |
| ANK3        | 118                   | rs12355908                                    | 0.0232                 | -0.1061 | 0.0467  |
| ANKK1       | 15                    | rs2734838                                     | 0.0524                 | -0.0817 | 0.0421  |
| AVPR1A      | 10                    | rs17098991                                    | 0.0786                 | 0.1206  | 0.0685  |
| AVPR1B      | 5                     | rs28588803                                    | 0.7664                 | 0.0198  | 0.0667  |
| AVPR2       | 5                     | rs4898457                                     | 0.3582                 | -0.0471 | 0.0513  |
| BDNF        | 14                    | rs7934165                                     | 0.0127                 | 0.0974  | 0.0390  |
| CACNA1C     | 191                   | rs12813847                                    | 0.0110                 | -0.1791 | 0.0704  |
| CCL28       | 9                     | rs779850                                      | 0.3308                 | 0.0510  | 0.0524  |
| CD3E        | 6                     | rs2277289                                     | 0.0170                 | -0.1039 | 0.0435  |
| CLOCK       | 10                    | rs9312661                                     | 0.0629                 | -0.0777 | 0.0417  |
| CNR1        | 22                    | rs9353525                                     | 0.0251                 | 0.1393  | 0.0621  |
| COMT        | 28                    | rs737866                                      | 0.0281                 | 0.0989  | 0.0450  |
| CREB1       | 7                     | rs2709373                                     | 0.3883                 | -0.0447 | 0.0518  |
| CRHR1       | 22                    | rs12373139                                    | 0.0777                 | 0.0849  | 0.0481  |
| CRHR2       | 19                    | rs24003                                       | 0.1778                 | -0.0556 | 0.0412  |
| CXCR4       | 8                     | rs12691874                                    | 0.3197                 | 0.0401  | 0.0403  |
| DRD1        | 23                    | rs10039221                                    | 0.0541                 | 0.0575  | 0.3467  |
| DRD2        | 29                    | rs2734838                                     | 0.0524                 | -0.0817 | 0.0421  |
| DRD3        | 23                    | rs6787134                                     | 0.0942                 | 0.0966  | 0.0577  |
| DRD4        | 6                     | rs11603404                                    | 0.5193                 | 0.0376  | 0.0583  |
| DRD5        | 3                     | rs1533615                                     | 0.1976                 | 0.1231  | 0.0955  |
| DTNBP1      | 31                    | rs13198533                                    | 0.0248                 | -0.1042 | 0.0464  |
| EDNRB       | 5                     | rs9544635                                     | 0.0988                 | -0.1136 | 0.0688  |
| FGFR1       | 13                    | rs328300                                      | 0.1735                 | 0.0547  | 0.0401  |
| FGFR2       | 33                    | rs2981451                                     | 0.0321                 | -0.0872 | 0.0406  |

|        |     |            |        |         |        |
|--------|-----|------------|--------|---------|--------|
| FGFR3  | 1   | rs743682   | 0.3224 | -0.0698 | 0.0705 |
| FGFR4  | 4   | rs451643   | 0.1443 | 0.0635  | 0.0435 |
| FKBP5  | 22  | rs10456432 | 0.0095 | -0.1287 | 0.0495 |
| FLT1   | 42  | rs9579176  | 0.0772 | 0.0863  | 0.0488 |
| FTO    | 97  | rs11642776 | 0.0073 | -0.2294 | 0.0853 |
| GNAS   | 16  | rs234623   | 0.0030 | 0.1201  | 0.0404 |
| GNB3   | 16  | rs5446     | 0.0345 | 0.0905  | 0.0427 |
| GNPDA2 | 2   | rs12640665 | 0.0652 | 0.1554  | 0.0842 |
| GRIA1  | 94  | rs11746246 | 0.1046 | 0.0716  | 0.0441 |
| GRIA2  | 9   | rs4691394  | 0.1014 | 0.0918  | 0.0560 |
| GRIA3  | 60  | rs5911623  | 0.0022 | -0.1411 | 0.0459 |
| GRIA4  | 57  | rs609665   | 0.0012 | -0.1338 | 0.0412 |
| GRIK1  | 116 | rs2205177  | 0.0623 | -0.1511 | 0.0810 |
| GRIK2  | 159 | rs6926170  | 0.0165 | 0.0968  | 0.0403 |
| GRIK3  | 31  | rs11801494 | 0.0017 | 0.2209  | 0.0703 |
| GRIK4  | 107 | rs4445646  | 0.0007 | 0.1425  | 0.0422 |
| GRIK5  | 5   | rs4803523  | 0.2810 | -0.0557 | 0.0517 |
| GRIN1  | 3   | rs4880094  | 0.0305 | -0.1044 | 0.0482 |
| GRIN2A | 147 | rs9928984  | 0.0131 | -0.2577 | 0.1037 |
| GRIN2B | 173 | rs10845809 | 0.0667 | -0.1168 | 0.0636 |
| GRIN2C | 5   | rs3803783  | 0.1467 | 0.0647  | 0.0446 |
| GRIN2D | 9   | rs275844   | 0.3410 | 0.0573  | 0.0602 |
| GRIN3A | 61  | rs1415644  | 0.0124 | -0.1191 | 0.0476 |
| GSK3A  | 1   | rs11878620 | 0.1134 | 0.1281  | 0.0808 |
| GSK3B  | 24  | rs11919783 | 0.0049 | -0.1838 | 0.0652 |
| HTR1A  | 2   | rs1364043  | 0.2660 | -0.0532 | 0.0478 |
| HTR1B  | 13  | rs9352483  | 0.0230 | 0.1288  | 0.0566 |
| HTR2A  | 50  | rs4942578  | 0.0241 | 0.1203  | 0.0533 |
| HTR2B  | 4   | rs13394402 | 0.0962 | 0.0866  | 0.0520 |
| HTR2C  | 15  | rs10875535 | 0.1850 | 0.1261  | 0.0951 |
| HTR3A  | 22  | rs10891611 | 0.0793 | 0.0964  | 0.0549 |
| HTR3B  | 13  | rs3891484  | 0.0418 | -0.1150 | 0.0564 |
| HTR4   | 41  | rs1833704  | 0.0005 | 0.1927  | 0.0552 |
| HTR5A  | 14  | rs2581844  | 0.0702 | -0.1804 | 0.0996 |
| HTR6   | 16  | rs2314331  | 0.0436 | 0.0983  | 0.0487 |
| HTR7   | 22  | rs11186300 | 0.3964 | -0.0344 | 0.0405 |
| IL1B   | 11  | rs4849124  | 0.3125 | -0.0441 | 0.0437 |
| IL6    | 16  | rs10242595 | 0.0074 | 0.1134  | 0.0423 |
| KCNK2  | 45  | rs7528988  | 0.1110 | 0.0702  | 0.0440 |
| KCTD15 | 17  | rs285680   | 0.0638 | 0.1308  | 0.0705 |
| LEP    | 12  | rs791595   | 0.3213 | 0.0521  | 0.0525 |
| LEPR   | 44  | rs10158579 | 0.0058 | -0.1675 | 0.0606 |
| MAOA   | 8   | rs6609257  | 0.1689 | 0.0625  | 0.0454 |
| MAOB   | 7   | rs6609257  | 0.1689 | 0.0625  | 0.0454 |



|         |     |            |        |         |        |
|---------|-----|------------|--------|---------|--------|
| MC4R    | 12  | rs12958350 | 0.2805 | 0.0438  | 0.0406 |
| MTCH2   | 3   | rs1474056  | 0.5678 | 0.0324  | 0.0568 |
| NEGR1   | 128 | rs7520086  | 0.0276 | -0.1369 | 0.0621 |
| NOS1    | 48  | rs12099598 | 0.0026 | 0.1456  | 0.0483 |
| NR3C1   | 20  | rs10482672 | 0.1672 | -0.0797 | 0.0577 |
| NTRK2   | 82  | rs11140783 | 0.0043 | -0.1997 | 0.0698 |
| OLIG1   | 8   | rs2834078  | 0.0665 | -0.1857 | 0.1011 |
| OLIG2   | 14  | rs2834072  | 0.1696 | -0.0547 | 0.0398 |
| OLIG3   | 14  | rs9385796  | 0.0958 | 0.1445  | 0.0867 |
| OPRM1   | 79  | rs10223804 | 0.0386 | 0.1154  | 0.0557 |
| P2RX1   | 20  | rs8076383  | 0.2703 | -0.0444 | 0.0402 |
| P2RX2   | 7   | rs5744990  | 0.5258 | -0.0343 | 0.0540 |
| P2RX3   | 11  | rs10896605 | 0.3936 | 0.0453  | 0.0530 |
| P2RX4   | 14  | rs3794207  | 0.1620 | -0.0597 | 0.0427 |
| P2RX5   | 9   | rs3817666  | 0.0866 | 0.1717  | 0.1001 |
| P2RX6   | 21  | rs1548412  | 0.0401 | 0.1550  | 0.0754 |
| P2RX7   | 25  | rs568531   | 0.1818 | 0.1010  | 0.0756 |
| PCLO    | 78  | rs6467917  | 0.0234 | -0.0939 | 0.0414 |
| PDE11A  | 104 | rs2695109  | 0.0234 | -0.1137 | 0.0501 |
| PDE1A   | 79  | rs11690832 | 0.0121 | -0.1032 | 0.0411 |
| PDE9A   | 56  | rs2269143  | 0.0055 | -0.1615 | 0.0581 |
| PER1    | 6   | rs2253820  | 0.0958 | 0.0909  | 0.0545 |
| PER2    | 11  | rs7579382  | 0.1774 | 0.0554  | 0.0410 |
| PER3    | 18  | rs12566535 | 0.1659 | 0.0843  | 0.0608 |
| PRKCH   | 80  | rs6573391  | 0.0047 | 0.2180  | 0.0770 |
| PSMB4   | 4   | rs1887545  | 0.1988 | 0.0678  | 0.0528 |
| PSMD9   | 6   | rs7137218  | 0.2302 | -0.0474 | 0.0395 |
| S100B   | 2   | rs2839362  | 0.2456 | 0.0862  | 0.0742 |
| SH2B1   | 2   | rs4788102  | 0.0070 | 0.1108  | 0.0410 |
| SLC6A1  | 43  | rs1710891  | 0.0480 | -0.0823 | 0.0416 |
| SLC6A2  | 33  | rs187715   | 0.0263 | -0.2036 | 0.0915 |
| SLC6A3  | 24  | rs6869645  | 0.0215 | -0.1824 | 0.0792 |
| SLC6A4  | 14  | rs2066713  | 0.0284 | 0.0909  | 0.0414 |
| STAT3   | 10  | rs17405722 | 0.2673 | 0.0940  | 0.0847 |
| TBX21   | 5   | rs7502875  | 0.0655 | 0.0932  | 0.0506 |
| TMEM18  | 21  | rs6728479  | 0.0319 | -0.1505 | 0.0701 |
| TPH1    | 8   | rs11024449 | 0.0571 | 0.0868  | 0.0456 |
| TPH2    | 34  | rs5019656  | 0.0376 | 0.1427  | 0.0686 |
| UST     | 134 | rs9377172  | 0.0130 | 0.1855  | 0.0746 |
| ZNF804A | 31  | rs2369595  | 0.0009 | -0.1676 | 0.0505 |

**Table 16:** Candidate gene results from the analysis between SNP makers and adjusted percentage change in depression severity in 568 NRI-treated individuals. Only the top associated SNP is shown from each gene. Regression coefficient is standardized and can be interpreted as a measure of effect size: it is the number of standard deviations in outcome per minor allele. Positive values of regression coefficient mean that carriers of more minor alleles had better treatment outcome. Negative values of regression coefficient mean that carriers of more minor alleles had worse outcomes..

| Gene symbol | Number of SNPs tested | Noradrenergic Antidepressant Analysis (n=568) |                        |         |         |
|-------------|-----------------------|-----------------------------------------------|------------------------|---------|---------|
|             |                       | Top SNP                                       | Regression Coefficient | SE      | p-Value |
| ABCB1       | 59                    | rs2214102                                     | 0.0461                 | -0.2104 | 0.0461  |
| ACE         | 11                    | rs4353                                        | 0.0875                 | -0.0996 | 0.0875  |
| ADRA1A      | 67                    | rs1442341                                     | 0.0045                 | 0.2523  | 0.0045  |
| ADRA1B      | 21                    | rs10515807                                    | 0.0750                 | 0.1329  | 0.0750  |
| ADRA2A      | 8                     | rs491589                                      | 0.2307                 | -0.0949 | 0.2307  |
| ADRA2B      | 5                     | rs749457                                      | 0.1691                 | 0.0803  | 0.1691  |
| ADRA2C      | 5                     | rs7692883                                     | 0.0170                 | -0.2208 | 0.0170  |
| ADRB1       | 16                    | rs17875474                                    | 0.1066                 | -0.2182 | 0.1066  |
| AKT1        | 4                     | rs4983559                                     | 0.2340                 | -0.0726 | 0.2340  |
| ANK3        | 118                   | rs10509119                                    | 0.0401                 | -0.1834 | 0.0401  |
| ANKK1       | 15                    | rs1055075                                     | 0.0700                 | -0.1116 | 0.0700  |
| AVPR1A      | 10                    | rs7960075                                     | 0.0624                 | 0.3246  | 0.0624  |
| AVPR1B      | 5                     | rs28425623                                    | 0.2560                 | 0.0995  | 0.2560  |
| AVPR2       | 5                     | rs2269368                                     | 0.1720                 | 0.1269  | 0.1720  |
| BDNF        | 14                    | rs10835211                                    | 0.1630                 | -0.0954 | 0.1630  |
| CACNA1C     | 191                   | rs2238044                                     | 0.0035                 | 0.1678  | 0.0035  |
| CCL28       | 9                     | rs922439                                      | 0.0547                 | -0.1261 | 0.0547  |
| CD3E        | 6                     | rs4938506                                     | 0.0449                 | -0.1316 | 0.0449  |
| CLOCK       | 10                    | rs11932595                                    | 0.0616                 | 0.1093  | 0.0616  |
| CNR1        | 22                    | rs806368                                      | 0.0257                 | 0.1590  | 0.0257  |
| COMT        | 28                    | rs165815                                      | 0.0155                 | 0.2030  | 0.0155  |
| CREB1       | 7                     | rs2551645                                     | 0.2839                 | 0.0653  | 0.2839  |
| CRHR1       | 22                    | rs242942                                      | 0.1942                 | 0.1160  | 0.1942  |
| CRHR2       | 19                    | rs255142                                      | 0.0996                 | -0.0968 | 0.0996  |
| CXCR4       | 8                     | rs11688530                                    | 0.1403                 | 0.1618  | 0.1403  |
| DRD1        | 23                    | rs265971                                      | 0.0271                 | 0.1447  | 0.0271  |
| DRD2        | 29                    | rs1800497                                     | 0.2231                 | -0.0910 | 0.2231  |
| DRD3        | 23                    | rs963468                                      | 0.1294                 | -0.0929 | 0.1294  |

|        |     |            |        |         |        |
|--------|-----|------------|--------|---------|--------|
| DRD4   | 6   | rs11603404 | 0.0867 | -0.1427 | 0.0867 |
| DRD5   | 3   | rs1519097  | 0.0916 | -0.1045 | 0.0916 |
| DTNBP1 | 31  | rs9396592  | 0.0457 | 0.1199  | 0.0457 |
| EDNRB  | 5   | rs7994913  | 0.6643 | 0.0259  | 0.6643 |
| FGFR1  | 13  | rs13317    | 0.0674 | 0.1248  | 0.0674 |
| FGFR2  | 33  | rs10510097 | 0.0591 | 0.1790  | 0.0591 |
| FGFR3  | 1   | rs743682   | 0.3376 | -0.0952 | 0.3376 |
| FGFR4  | 4   | rs244731   | 0.0966 | 0.1178  | 0.0966 |
| FKBP5  | 22  | rs10456432 | 0.1195 | 0.1174  | 0.1195 |
| FLT1   | 42  | rs10507385 | 0.0116 | -0.1574 | 0.0116 |
| FTO    | 97  | rs4386132  | 0.0154 | -0.3249 | 0.0154 |
| GNAS   | 16  | rs13042263 | 0.0373 | -0.1257 | 0.0373 |
| GNB3   | 16  | rs5439     | 0.0048 | -0.2706 | 0.0048 |
| GNPDA2 | 2   | rs12640665 | 0.5140 | 0.0737  | 0.5140 |
| GRIA1  | 94  | rs1353090  | 0.0239 | 0.2584  | 0.0239 |
| GRIA2  | 9   | rs17035903 | 0.0137 | -0.1792 | 0.0137 |
| GRIA3  | 60  | rs3761557  | 0.0196 | 0.1660  | 0.0196 |
| GRIA4  | 57  | rs17391295 | 0.0107 | 0.2870  | 0.0107 |
| GRIK1  | 116 | rs363512   | 0.0003 | 0.3827  | 0.0003 |
| GRIK2  | 159 | rs2749056  | 0.0092 | 0.2824  | 0.0092 |
| GRIK3  | 31  | rs3767065  | 0.0078 | 0.2461  | 0.0078 |
| GRIK4  | 107 | rs3781817  | 0.0067 | -0.1565 | 0.0067 |
| GRIK5  | 5   | rs2217342  | 0.0800 | -0.1774 | 0.0800 |
| GRIN1  | 3   | rs10870198 | 0.0792 | 0.1020  | 0.0792 |
| GRIN2A | 147 | rs7188329  | 0.0028 | 0.1761  | 0.0028 |
| GRIN2B | 173 | rs220590   | 0.0054 | 0.1712  | 0.0054 |
| GRIN2C | 5   | rs1568447  | 0.5009 | -0.0403 | 0.5009 |
| GRIN2D | 9   | rs1799286  | 0.0537 | 0.2799  | 0.0537 |
| GRIN3A | 61  | rs945870   | 0.1678 | 0.1413  | 0.1678 |
| GSK3A  | 1   | rs11878620 | 0.6192 | -0.0524 | 0.6192 |
| GSK3B  | 24  | rs11925868 | 0.2200 | 0.1019  | 0.2200 |
| HTR1A  | 2   | rs1364043  | 0.7489 | -0.0218 | 0.7489 |
| HTR1B  | 13  | rs9352481  | 0.1686 | 0.0823  | 0.1686 |
| HTR2A  | 50  | rs4942578  | 0.0277 | 0.1673  | 0.0277 |

|        |     |            |        |         |        |
|--------|-----|------------|--------|---------|--------|
| HTR2B  | 4   | rs13394402 | 0.0430 | 0.1588  | 0.0430 |
| HTR2C  | 15  | rs1414324  | 0.1164 | 0.1457  | 0.1164 |
| HTR3A  | 22  | rs17543669 | 0.0478 | -0.2585 | 0.0478 |
| HTR3B  | 13  | rs11606194 | 0.0712 | -0.1876 | 0.0712 |
| HTR4   | 41  | rs2278392  | 0.0909 | 0.1546  | 0.0909 |
| HTR5A  | 14  | rs2581844  | 0.4416 | -0.0938 | 0.4416 |
| HTR6   | 16  | rs7522389  | 0.0143 | -0.1645 | 0.0143 |
| HTR7   | 22  | rs10785973 | 0.0369 | 0.1285  | 0.0369 |
| IL1B   | 11  | rs12469600 | 0.0952 | -0.1086 | 0.0952 |
| IL6    | 16  | rs10242595 | 0.0913 | -0.1069 | 0.0913 |
| KCNK2  | 45  | rs11802559 | 0.0900 | -0.1251 | 0.0900 |
| KCTD15 | 17  | rs3810361  | 0.2135 | -0.0741 | 0.2135 |
| LEP    | 12  | rs10487506 | 0.0020 | 0.1802  | 0.0020 |
| LEPR   | 44  | rs11208659 | 0.0799 | 0.1761  | 0.0799 |
| MAOA   | 8   | rs909525   | 0.1732 | -0.0918 | 0.1732 |
| MAOB   | 7   | rs3027409  | 0.2234 | -0.2366 | 0.2234 |
| MC4R   | 12  | rs11872992 | 0.3479 | -0.0779 | 0.3479 |
| MTCH2  | 3   | rs10838738 | 0.7756 | -0.0178 | 0.7756 |
| NEGR1  | 128 | rs2221513  | 0.0010 | -0.2588 | 0.0010 |
| NOS1   | 48  | rs1879417  | 0.1244 | -0.0896 | 0.1244 |
| NR3C1  | 20  | rs4607376  | 0.0017 | 0.1821  | 0.0017 |
| NTRK2  | 82  | rs2808707  | 0.0281 | 0.1331  | 0.0281 |
| OLIG1  | 8   | rs4817527  | 0.1559 | 0.0819  | 0.1559 |
| OLIG2  | 14  | rs2834076  | 0.0317 | 0.1231  | 0.0317 |
| OLIG3  | 14  | rs10428802 | 0.0651 | 0.1281  | 0.0651 |
| OPRM1  | 79  | rs512053   | 0.0823 | -0.1732 | 0.0823 |
| P2RX1  | 20  | rs6502751  | 0.0458 | 0.2101  | 0.0458 |
| P2RX2  | 7   | rs11146967 | 0.0926 | -0.0986 | 0.0926 |
| P2RX3  | 11  | rs490358   | 0.1339 | 0.1004  | 0.1339 |
| P2RX4  | 14  | rs10774589 | 0.1166 | -0.1108 | 0.1166 |
| P2RX5  | 9   | rs220488   | 0.1399 | -0.1141 | 0.1399 |
| P2RX6  | 21  | rs12627919 | 0.0597 | 0.2000  | 0.0597 |

|         |     |            |        |         |        |
|---------|-----|------------|--------|---------|--------|
| P2RX7   | 25  | rs12815078 | 0.1200 | 0.1518  | 0.1200 |
| PCLO    | 78  | rs7807790  | 0.0149 | 0.1698  | 0.0149 |
| PDE11A  | 104 | rs763757   | 0.0187 | 0.3632  | 0.0187 |
| PDE1A   | 79  | rs833153   | 0.0093 | -0.4345 | 0.0093 |
| PDE9A   | 56  | rs2245730  | 0.0495 | -0.1147 | 0.0495 |
| PER1    | 6   | rs2304911  | 0.2013 | -0.1733 | 0.2013 |
| PER2    | 11  | rs7579382  | 0.1655 | 0.0812  | 0.1655 |
| PER3    | 18  | rs10462018 | 0.0198 | -0.2023 | 0.0198 |
| PRKCH   | 80  | rs10438143 | 0.0122 | -0.3498 | 0.0122 |
| PSMB4   | 4   | rs1887545  | 0.4514 | -0.0591 | 0.4514 |
| PSMD9   | 6   | rs895959   | 0.0083 | 0.2321  | 0.0083 |
| S100B   | 2   | rs2839362  | 0.2712 | 0.1133  | 0.2712 |
| SH2B1   | 2   | rs4788102  | 0.5052 | -0.0387 | 0.5052 |
| SLC6A1  | 43  | rs1710887  | 0.0415 | 0.1238  | 0.0415 |
| SLC6A2  | 33  | rs36024    | 0.0594 | -0.1095 | 0.0594 |
| SLC6A3  | 24  | rs464049   | 0.1563 | -0.0832 | 0.1563 |
| SLC6A4  | 14  | rs1050565  | 0.0112 | 0.1551  | 0.0112 |
| STAT3   | 10  | rs8074524  | 0.3461 | -0.0717 | 0.3461 |
| TBX21   | 5   | rs7502875  | 0.2383 | 0.0781  | 0.2383 |
| TMEM18  | 21  | rs4854350  | 0.2148 | -0.0783 | 0.2148 |
| TPH1    | 8   | rs17794760 | 0.2802 | -0.0830 | 0.2802 |
| TPH2    | 34  | rs12231356 | 0.2972 | -0.1286 | 0.2972 |
| UST     | 134 | rs2500535  | 0.0006 | -0.4320 | 0.0006 |
| ZNF804A | 31  | rs13384546 | 0.1150 | 0.1284  | 0.1150 |

**Table 17:** Candidate gene results from the analysis between SNP markers and antidepressant type (SRI vs. NRI) for their effects on the adjusted percentage change in depression severity among the 949 individuals randomly allocated to SRI or NRI antidepressant. Only the top associated SNP is shown from each gene. Genes located on the X-chromosome were not tested. Regression coefficient is standardized and can be interpreted as a measure of effect size: it is the number of standard deviations in outcome per minor allele. Positive values of regression coefficient mean that carriers of more minor alleles had better treatment outcome. Negative values of regression coefficient mean that carriers of more minor alleles had worse outcomes.

| Gene symbol | Number of SNPs tested | Gene by Drug Interaction Analysis (n=949) |                        |         |         |
|-------------|-----------------------|-------------------------------------------|------------------------|---------|---------|
|             |                       | Top SNP                                   | Regression Coefficient | SE      | p-Value |
| ABCB1       | 59                    | rs2214102                                 | 0.0203                 | -0.3466 | 0.0203  |
| ACE         | 11                    | rs4311                                    | 0.0052                 | -0.2533 | 0.0052  |
| ADRA1A      | 67                    | rs1472346                                 | 0.0247                 | 0.2348  | 0.0247  |
| ADRA1B      | 21                    | rs7718362                                 | 0.0083                 | -0.8444 | 0.0083  |
| ADRA2A      | 8                     | rs491589                                  | 0.3466                 | -0.1152 | 0.3466  |
| ADRA2B      | 5                     | rs749457                                  | 0.3433                 | 0.0876  | 0.3433  |
| ADRA2C      | 5                     | rs4916612                                 | 0.0359                 | 0.3121  | 0.0359  |
| ADRB1       | 16                    | rs17875474                                | 0.1056                 | -0.3653 | 0.1056  |
| AKT1        | 4                     | rs2494738                                 | 0.4362                 | 0.1327  | 0.4362  |
| ANK3        | 118                   | rs1981251                                 | 0.0736                 | -0.1643 | 0.0736  |
| ANKK1       | 15                    | rs1800497                                 | 0.2921                 | -0.1195 | 0.2921  |
| AVPR1A      | 10                    | rs17098991                                | 0.1485                 | -0.2234 | 0.1485  |
| AVPR1B      | 5                     | rs28588803                                | 0.4575                 | 0.1125  | 0.4575  |
| AVPR2       |                       |                                           |                        |         |         |
| BDNF        | 14                    | rs7934165                                 | 0.0964                 | -0.1471 | 0.0964  |
| CACNA1C     | 191                   | rs17801211                                | 0.0225                 | 0.2146  | 0.0225  |
| CCL28       | 9                     | rs779850                                  | 0.1229                 | 0.1784  | 0.1229  |
| CD3E        | 6                     | rs12576947                                | 0.4350                 | 0.0737  | 0.4350  |
| CLOCK       | 10                    | rs1522113                                 | 0.0011                 | 0.6128  | 0.0011  |
| CNR1        | 22                    | rs1406977                                 | 0.0891                 | -0.1887 | 0.0891  |
| COMT        | 28                    | rs737866                                  | 0.0494                 | -0.1925 | 0.0494  |
| CREB1       | 7                     | rs2709373                                 | 0.0570                 | 0.2157  | 0.0570  |
| CRHR1       | 22                    | rs242942                                  | 0.0714                 | 0.2581  | 0.0714  |
| CRHR2       | 19                    | rs255142                                  | 0.1517                 | -0.1309 | 0.1517  |
| CXCR4       | 8                     | rs4954391                                 | 0.2769                 | 0.1107  | 0.2769  |
| DRD1        | 23                    | rs265978                                  | 0.0476                 | 0.1803  | 0.0476  |
| DRD2        | 29                    | rs11214606                                | 0.2609                 | 0.2505  | 0.2609  |
| DRD3        | 23                    | rs7633291                                 | 0.0958                 | 0.1943  | 0.0958  |

|        |     |            |        |         |        |
|--------|-----|------------|--------|---------|--------|
| DRD4   | 6   | rs11603404 | 0.0085 | -0.3356 | 0.0085 |
| DRD5   | 3   | rs1519097  | 0.0301 | -0.2039 | 0.0301 |
| DTNBP1 | 31  | rs2072824  | 0.1152 | -0.1729 | 0.1152 |
| EDNRB  | 5   | rs9544635  | 0.1857 | 0.2078  | 0.1857 |
| FGFR1  | 13  | rs7825208  | 0.0125 | -0.3641 | 0.0125 |
| FGFR2  | 33  | rs3750817  | 0.0410 | -0.1862 | 0.0410 |
| FGFR3  | 1   | rs743682   | 0.1061 | -0.2496 | 0.1061 |
| FGFR4  | 4   | rs451643   | 0.2176 | -0.1202 | 0.2176 |
| FKBP5  | 22  | rs10456432 | 0.0274 | 0.2454  | 0.0274 |
| FLT1   | 42  | rs9513089  | 0.0581 | 0.1768  | 0.0581 |
| FTO    | 97  | rs11642776 | 0.0194 | 0.4594  | 0.0194 |
| GNAS   | 16  | rs13042263 | 0.0034 | -0.2660 | 0.0034 |
| GNB3   | 16  | rs10744720 | 0.0075 | 0.2806  | 0.0075 |
| GNPDA2 | 2   | rs12499960 | 0.3327 | -0.1040 | 0.3327 |
| GRIA1  | 94  | rs11741791 | 0.0051 | 0.4859  | 0.0051 |
| GRIA2  | 9   | rs4691394  | 0.1962 | -0.1697 | 0.1962 |
| GRIA3  |     |            |        |         |        |
| GRIA4  | 57  | rs2249031  | 0.0255 | -0.4852 | 0.0255 |
| GRIK1  | 116 | rs363564   | 0.0310 | 0.2607  | 0.0310 |
| GRIK2  | 159 | rs2852507  | 0.0282 | -0.2512 | 0.0282 |
| GRIK3  | 31  | rs537958   | 0.0827 | -0.1610 | 0.0827 |
| GRIK4  | 107 | rs6589832  | 0.0060 | -0.2411 | 0.0060 |
| GRIK5  | 5   | rs454150   | 0.0451 | -0.3017 | 0.0451 |
| GRIN1  | 3   | rs4880094  | 0.0049 | 0.2938  | 0.0049 |
| GRIN2A | 147 | rs1550959  | 0.0462 | -0.2814 | 0.0462 |
| GRIN2B | 173 | rs2300238  | 0.0042 | -0.2595 | 0.0042 |
| GRIN2C | 5   | rs690418   | 0.2538 | -0.1260 | 0.2538 |
| GRIN2D | 9   | rs1799286  | 0.0263 | 0.5100  | 0.0263 |
| GRIN3A | 61  | rs945870   | 0.0570 | 0.2994  | 0.0570 |
| GSK3A  | 1   | rs11878620 | 0.0827 | -0.3126 | 0.0827 |
| GSK3B  | 24  | rs11919783 | 0.0145 | 0.3553  | 0.0145 |
| HTR1A  | 2   | rs1364043  | 0.2203 | 0.1319  | 0.2203 |
| HTR1B  | 13  | rs1343491  | 0.0155 | -0.3655 | 0.0155 |
| HTR2A  | 50  | rs9534507  | 0.0725 | 0.3925  | 0.0725 |
| HTR2B  | 4   | rs4973377  | 0.0399 | 0.2630  | 0.0399 |
| HTR2C  |     |            |        |         |        |

|        |     |            |        |         |        |
|--------|-----|------------|--------|---------|--------|
| HTR3A  | 22  | rs17543669 | 0.0289 | -0.4484 | 0.0289 |
| HTR3B  | 13  | rs3891484  | 0.0205 | 0.2987  | 0.0205 |
| HTR4   | 41  | rs888961   | 0.0045 | 0.3042  | 0.0045 |
| HTR5A  | 14  | rs1657280  | 0.4277 | -0.0752 | 0.4277 |
| HTR6   | 16  | rs9064     | 0.0347 | 0.2290  | 0.0347 |
| HTR7   | 22  | rs1107688  | 0.0050 | -0.3532 | 0.0050 |
| IL1B   | 11  | rs12469600 | 0.0129 | -0.2589 | 0.0129 |
| IL6    | 16  | rs2069837  | 0.0045 | -0.5079 | 0.0045 |
| KCNK2  | 45  | rs1157493  | 0.1404 | 0.1430  | 0.1404 |
| KCTD15 | 17  | rs29942    | 0.2676 | -0.1039 | 0.2676 |
| LEP    | 12  | rs2021808  | 0.0737 | -0.3387 | 0.0737 |
| LEPR   | 44  | rs6588147  | 0.0853 | -0.1605 | 0.0853 |
| MAOA   |     |            |        |         |        |
| MAOB   |     |            |        |         |        |
| MC4R   | 12  | rs17066865 | 0.2071 | -0.4297 | 0.2071 |
| MTCH2  | 3   | rs10838738 | 0.3042 | -0.0980 | 0.3042 |
| NEGR1  | 128 | rs6683448  | 0.0018 | -0.2917 | 0.0018 |
| NOS1   | 48  | rs11068458 | 0.0348 | -0.4231 | 0.0348 |
| NR3C1  | 20  | rs4607376  | 0.0094 | 0.2276  | 0.0094 |
| NTRK2  | 82  | rs7875184  | 0.0008 | 0.4476  | 0.0008 |
| OLIG1  | 8   | rs2834079  | 0.0356 | -0.2775 | 0.0356 |
| OLIG2  | 14  | rs6517137  | 0.0916 | -0.2955 | 0.0916 |
| OLIG3  | 14  | rs1360606  | 0.1296 | 0.1764  | 0.1296 |
| OPRM1  | 79  | rs13196610 | 0.0130 | -0.4193 | 0.0130 |
| P2RX1  | 20  | rs12451483 | 0.0701 | -0.1760 | 0.0701 |
| P2RX2  | 7   | rs5744990  | 0.2065 | 0.1480  | 0.2065 |
| P2RX3  | 11  | rs10896605 | 0.1260 | -0.1798 | 0.1260 |
| P2RX4  | 14  | rs2686386  | 0.0583 | -0.2177 | 0.0583 |
| P2RX5  | 9   | rs2318104  | 0.1643 | -0.1562 | 0.1643 |
| P2RX6  | 21  | rs2239961  | 0.2291 | 0.1392  | 0.2291 |
| P2RX7  | 25  | rs2686386  | 0.0583 | -0.2177 | 0.0583 |
| PCLO   | 78  | rs7807790  | 0.0269 | 0.2242  | 0.0269 |
| PDE11A | 104 | rs7605757  | 0.0062 | 0.3690  | 0.0062 |
| PDE1A  | 79  | rs833158   | 0.0127 | -0.3178 | 0.0127 |
| PDE9A  | 56  | rs7279886  | 0.0354 | -0.2011 | 0.0354 |
| PER1   | 6   | rs2304911  | 0.1427 | -0.3047 | 0.1427 |
| PER2   | 11  | rs4663868  | 0.2964 | 0.1642  | 0.2964 |



|         |     |            |        |         |        |
|---------|-----|------------|--------|---------|--------|
| PER3    | 18  | rs1044245  | 0.0788 | -0.2318 | 0.0788 |
| PRKCH   | 80  | rs1033908  | 0.0015 | -0.3448 | 0.0015 |
| PSMB4   | 4   | rs1887545  | 0.0445 | -0.2413 | 0.0445 |
| PSMD9   | 6   | rs4069666  | 0.0058 | -0.2703 | 0.0058 |
| S100B   | 2   | rs2839357  | 0.7700 | -0.0436 | 0.7700 |
| SH2B1   | 2   | rs4788102  | 0.0972 | -0.1494 | 0.0972 |
| SLC6A1  | 43  | rs1710887  | 0.0107 | 0.2404  | 0.0107 |
| SLC6A2  | 33  | rs3785143  | 0.0327 | -0.3324 | 0.0327 |
| SLC6A3  | 24  | rs27072    | 0.0623 | -0.2067 | 0.0623 |
| SLC6A4  | 14  | rs7214248  | 0.2258 | 0.1111  | 0.2258 |
| STAT3   | 10  | rs4796649  | 0.3194 | 0.1592  | 0.3194 |
| TBX21   | 5   | rs16946264 | 0.0443 | -0.3005 | 0.0443 |
| TMEM18  | 21  | rs1879524  | 0.0040 | 0.3484  | 0.0040 |
| TPH1    | 8   | rs172424   | 0.3090 | -0.0928 | 0.3090 |
| TPH2    | 34  | rs1843809  | 0.0556 | -0.2456 | 0.0556 |
| UST     | 134 | rs9386240  | 0.0059 | -0.3054 | 0.0059 |
| ZNF804A | 31  | rs12477430 | 0.1564 | 0.1391  | 0.1564 |

## 8 Imputation results from NEWMEDS

Imputation was undertaken in the sample to acquire information about non-genotyped SNPs which may have more statistical evidence for association to outcome than genotyped markers. BEAGLE 3.3 [62] was used for imputing and the HapMap phase 3 CEU population was the reference dataset. This resulted in a dataset of 1.4 million markers. Analyses were conducted on dosage data with estimated probability of each genotype, in order to consider the uncertainty of the imputation. The accuracy of imputation is reported for each result. Imputed data was analysed for association to outcome using the *dosage* command in PLINK [13] in any antidepressant taken (n=1790), in SRI individuals only (n=1222) and in NRI individuals only (n=568). Imputation analyses also included four covariates from EIGENSTRAT to correct for population stratification, as was done in the original analyses.

Tables 18 through 20 show the results from the analysis of the imputed data on response to any antidepressant (Table 18), response to a serotonergic antidepressant (Table 19) and response to a noradrenergic antidepressant (Table 20). Figures 15 to 25 are regional association plots for SNPs with p-values below the genome wide suggestive level of  $5 \times 10^{-6}$  from the imputation analysis.

**Table 18:** Imputed results for the analysis of response to any antidepressant in the entire sample (n=1790) under an additive genetic model. Results are shown for SNPs below the genome-wide suggestive level of evidence of  $p < 5 \times 10^{-6}$ . P-values for SNPs which were genotyped directly are also shown. Regression coefficient is standardized and can be interpreted as a measure of effect size: it is the number of standard deviations in outcome per minor allele. Positive values of regression coefficient mean that carriers of more minor alleles had better treatment outcome. Negative values of regression coefficient mean that carriers of more minor alleles had worse outcomes. Imputation Accuracy's close to 1 indicate the imputation was robust for that SNP. Results from SNPs with an Imputation Accuracy below 0.8 should be taken with caution.

| CHR | SNP        | Position  | GENE                     | Allele | Imputation Accuracy | Regression Coefficient | SE   | p-value  | Genotyped | Genotype p-value |
|-----|------------|-----------|--------------------------|--------|---------------------|------------------------|------|----------|-----------|------------------|
| 6   | rs10499161 | 129954492 | <i>ARHGAP18</i>          | A      | 0.99                | 0.23                   | 0.05 | 4.01E-06 | N         |                  |
| 9   | rs10818702 | 124285545 | <i>OR1J2</i>             | C      | 1.00                | 0.19                   | 0.04 | 2.39E-06 | Y         | 2.19E-06         |
| 11  | rs10832840 | 1354473   | <i>BRSK2/<br/>PEN11B</i> | C      | 1.02                | 0.20                   | 0.04 | 4.68E-06 | N         |                  |
| 11  | rs4881745  | 1354892   | <i>BRSK2/<br/>PEN11B</i> | C      | 0.96                | 0.21                   | 0.04 | 3.70E-06 | N         |                  |
| 14  | rs11624702 | 46588187  | <i>MDGA2</i>             | C      | 1.02                | -0.15                  | 0.03 | 4.08E-06 | Y         | 4.08E-06         |

**Table 19:** Imputed results for the analysis of response to SRI antidepressant (n=1222) under an additive genetic model. Results are shown for SNPs below the genome-wide suggestive level of evidence of  $p < 5 \times 10^{-6}$ . P-values for SNPs which were genotyped directly are also shown. Regression coefficient is standardized and can be interpreted as a measure of effect size: it is the number of standard deviations in outcome per minor allele. Positive values of regression coefficient mean that carriers of more minor alleles had better treatment outcome. Negative values of regression coefficient mean that carriers of more minor alleles had worse outcomes. Imputation Accuracy's close to 1 indicate the imputation was robust for that SNP. Results from SNPs with an Imputation Accuracy below 0.8 should be taken with caution.

| CHR | SNP        | Position  | GENE    | Allele | Imputation Accuracy | Regression Coefficient | SE   | p-value  | Genotyped | Genotype p-value |
|-----|------------|-----------|---------|--------|---------------------|------------------------|------|----------|-----------|------------------|
| 5   | rs9291836  | 64716023  | ADAMTS6 | C      | 0.98                | 0.19                   | 0.04 | 2.00E-06 | N         |                  |
| 5   | rs7708972  | 64724497  | ADAMTS6 | A      | 1.04                | 0.19                   | 0.04 | 1.90E-06 | Y         | 2.49E-06         |
| 5   | rs10042191 | 64733622  | ADAMTS6 | C      | 0.98                | 0.20                   | 0.04 | 1.03E-06 | N         |                  |
| 5   | rs10069691 | 64742796  | ADAMTS6 | A      | 1.01                | 0.19                   | 0.04 | 1.43E-06 | N         |                  |
| 5   | rs9291837  | 64743875  | ADAMTS6 | C      | 1.01                | 0.19                   | 0.04 | 2.12E-06 | N         |                  |
| 5   | rs10072030 | 64761280  | ADAMTS6 | A      | 1.01                | -0.19                  | 0.04 | 2.33E-06 | N         |                  |
| 5   | rs1493451  | 64762196  | ADAMTS6 | C      | 1.01                | -0.19                  | 0.04 | 2.35E-06 | Y         | 2.35E-06         |
| 5   | rs6449784  | 64766607  | ADAMTS6 | C      | 1.00                | 0.19                   | 0.04 | 2.05E-06 | N         |                  |
| 5   | rs2047064  | 64769683  | ADAMTS6 | A      | 1.01                | -0.19                  | 0.04 | 2.04E-06 | N         |                  |
| 5   | rs7728131  | 64770458  | ADAMTS6 | A      | 0.97                | 0.19                   | 0.04 | 2.16E-06 | N         |                  |
| 5   | rs6876189  | 64771296  | ADAMTS6 | A      | 0.97                | 0.19                   | 0.04 | 1.80E-06 | N         |                  |
| 5   | rs7705423  | 64776521  | ADAMTS6 | A      | 0.96                | 0.20                   | 0.04 | 1.74E-06 | N         |                  |
| 5   | rs2131587  | 64781681  | ADAMTS6 | C      | 0.95                | -0.20                  | 0.04 | 1.53E-06 | N         |                  |
| 5   | rs7725105  | 64785479  | ADAMTS6 | A      | 0.96                | 0.20                   | 0.04 | 1.71E-06 | N         |                  |
| 5   | rs10515893 | 164692074 |         | A      | 1.04                | -0.21                  | 0.04 | 1.37E-06 | Y         | 1.37E-06         |
| 12  | rs10783282 | 47433214  | ADCY6   | A      | 0.95                | -0.24                  | 0.05 | 1.16E-06 | Y         | 1.16E-06         |

**Table 20:** Imputed results for the analysis of response to NRI antidepressant (n=568) under an additive genetic model. Results are shown for SNPs below the genome-wide suggestive level of evidence of  $p < 5 \times 10^{-6}$ . P-values for SNPs which were genotyped directly are also shown. Regression coefficient is standardized and can be interpreted as a measure of effect size: it is the number of standard deviations in outcome per minor allele. Positive values of regression coefficient mean that carriers of more minor alleles had better treatment outcome. Negative values of regression coefficient mean that carriers of more minor alleles had worse outcomes. Imputation Accuracy's close to 1 indicate the imputation was robust for that SNP. Results from SNPs with an Imputation Accuracy below 0.8 should be taken with caution.

| CHR | SNP        | Position  | GENE          | Allele | Imputation Accuracy | Regression Coefficient | SE   | p-value  | Genotyped | Genotype p-value |
|-----|------------|-----------|---------------|--------|---------------------|------------------------|------|----------|-----------|------------------|
| 1   | rs2988738  | 227427128 |               | C      | 0.76                | -1.30                  | 0.28 | 4.48E-06 | N         |                  |
| 5   | rs2888109  | 66312784  | <i>MAST4</i>  | G      | 0.15                | -0.91                  | 0.20 | 4.67E-06 | N         |                  |
| 5   | rs16875947 | 78136556  | <i>ARSB</i>   | A      | 0.99                | -0.38                  | 0.08 | 9.80E-07 | N         |                  |
| 5   | rs7711802  | 78138239  | <i>ARSB</i>   | A      | 1.00                | 0.37                   | 0.08 | 1.05E-06 | N         |                  |
| 5   | rs16876279 | 78139361  | <i>ARSB</i>   | C      | 1.00                | -0.37                  | 0.08 | 1.05E-06 | N         |                  |
| 7   | rs13237776 | 27676198  | <i>HIBADH</i> | C      | 1.02                | 0.34                   | 0.07 | 1.77E-06 | Y         | 1.77E-06         |
| 7   | rs12534474 | 27677080  | <i>HIBADH</i> | A      | 1.02                | -0.34                  | 0.07 | 1.77E-06 | Y         | 1.77E-06         |

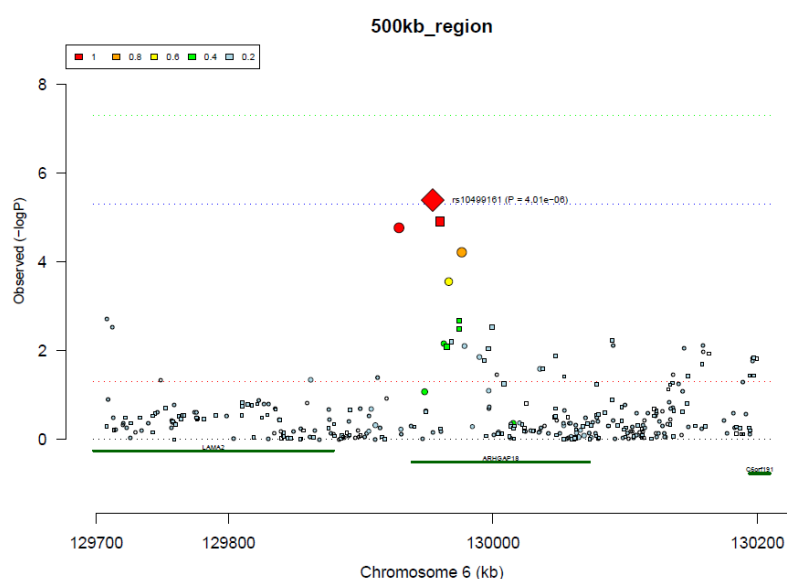

**Figure 15:** Chromosome 6 associated region with response to any antidepressant treatment (n=1790). Negative decadic logarithm of the uncorrected p-values is plotted against chromosomal location of genotyped (circles) and imputed (squares) SNP markers. The graph covers 500kbp upstream and downstream from the strongest associated imputed marker (rs10499161). Colouring reflects the linkage disequilibrium (LD) between rs10499161 and other SNP markers, with red meaning strong LD and blue weak LD. The red dotted line is  $p=0.05$ , the blue dotted line is  $p=5 \times 10^{-6}$  and the green dotted line is  $p=5 \times 10^{-8}$ .

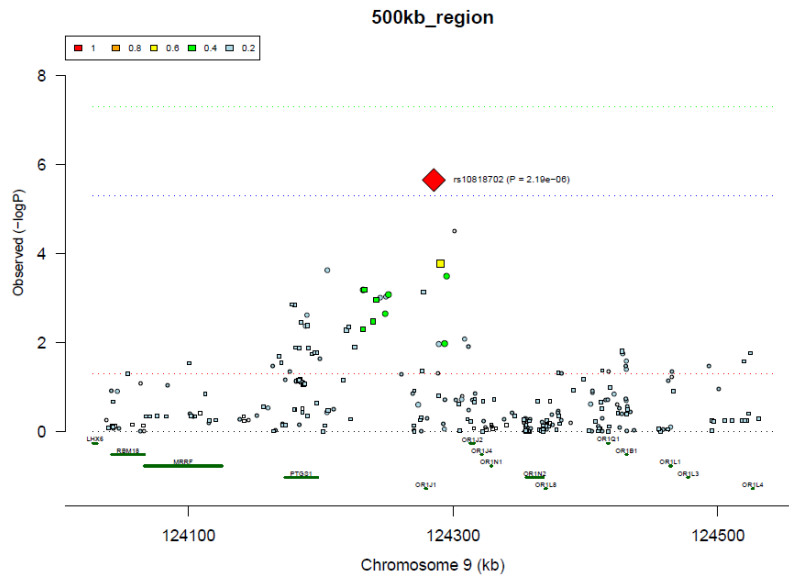

**Figure 16:** Chromosome 9 associated region with response to any antidepressant treatment (n=1790). Negative decadic logarithm of the uncorrected p-values is plotted against chromosomal location of genotyped (circles) and imputed (squares) SNP markers. The graph covers 500kbp upstream and downstream from the strongest associated genotyped marker (rs10818702). Colouring reflects the linkage disequilibrium (LD) between rs10818702 and other SNP markers, with red meaning strong LD and blue weak LD. The red dotted line is  $p=0.05$ , the blue dotted line is  $p=5 \times 10^{-6}$  and the green dotted line is  $p=5 \times 10^{-8}$ .

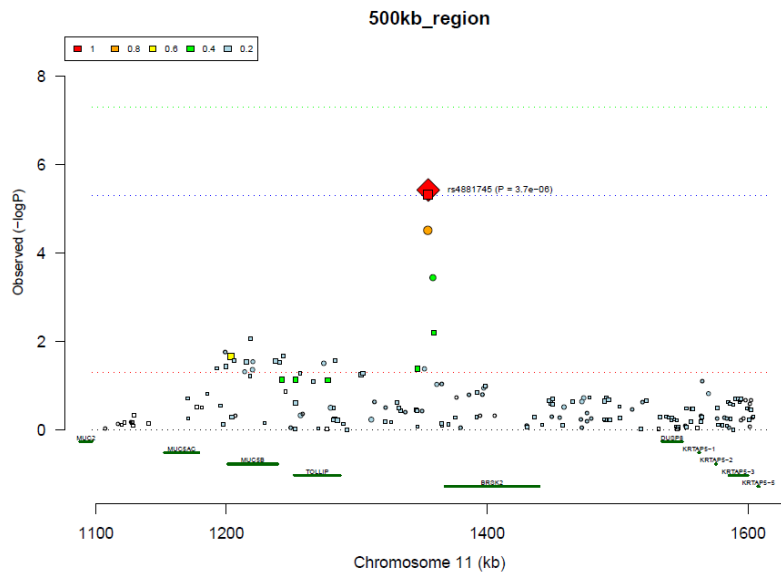

**Figure 17:** Chromosome 11 associated region with response to any antidepressant treatment (n=1790). Negative decadic logarithm of the uncorrected p-values is plotted against chromosomal location of genotyped (circles) and imputed (squares) SNP markers. The graph covers 500kbp upstream and downstream from the strongest associated imputed marker (rs4881745). Colouring reflects the linkage disequilibrium (LD) between rs4881745 and other SNP markers, with red meaning strong LD and blue weak LD. The red dotted line is  $p=0.05$ , the blue dotted line is  $p=5 \times 10^{-6}$  and the green dotted line is  $p=5 \times 10^{-8}$ .

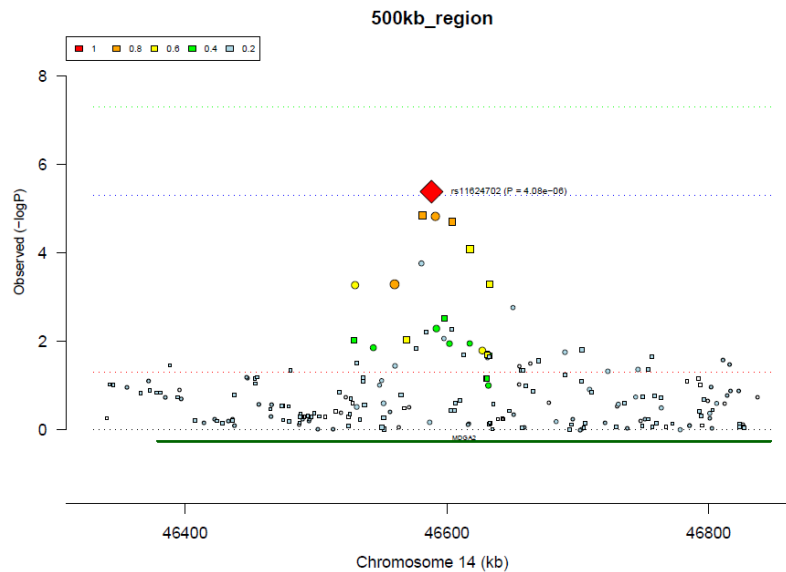

**Figure 18:** Chromosome 14 associated region with response to any antidepressant treatment (n=1790). Negative decadic logarithm of the uncorrected p-values is plotted against chromosomal location of genotyped (circles) and imputed (squares) SNP markers. The graph covers 500kbp upstream and downstream from the strongest associated genotyped marker (rs11624702). Colouring reflects the linkage disequilibrium (LD) between rs11624702 and other SNP markers, with red meaning strong LD and blue weak LD. The red dotted line is  $p=0.05$ , the blue dotted line is  $p=5 \times 10^{-6}$  and the green dotted line is  $p=5 \times 10^{-8}$ .

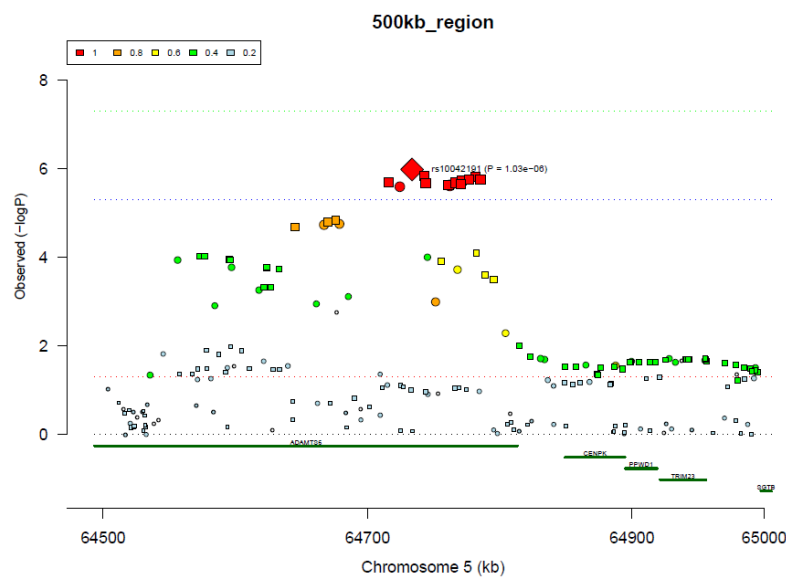

**Figure 19:** Chromosome 5 associated region with response to serotonergic antidepressant treatment (n=1222). Negative decadic logarithm of the uncorrected p-values is plotted against chromosomal location of genotyped (circles) and imputed (squares) SNP markers. The graph covers 500kbp upstream and downstream from the strongest associated imputed marker (rs10042191). Colouring reflects the linkage disequilibrium (LD) between rs10042191 and other SNP markers, with red meaning strong LD and blue weak LD. The red dotted line is  $p=0.05$ , the blue dotted line is  $p=5 \times 10^{-6}$  and the green dotted line is  $p=5 \times 10^{-8}$ .

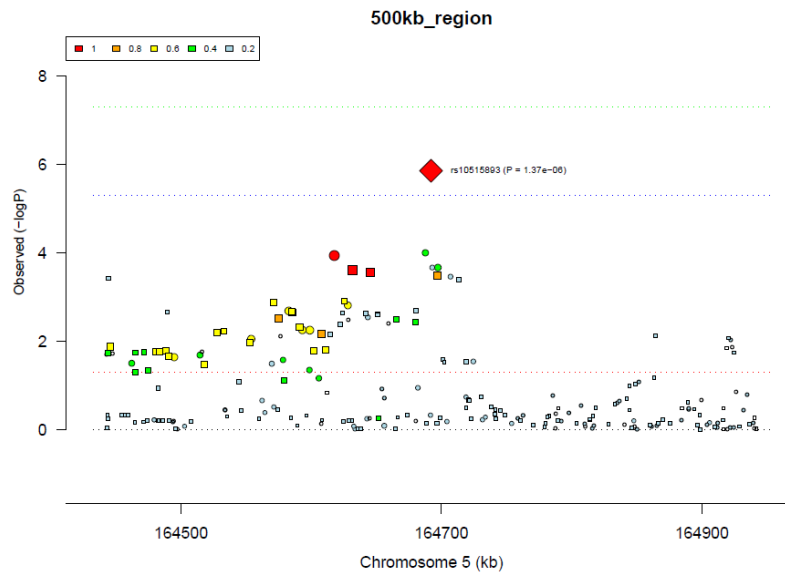

**Figure 20:** Chromosome 5 associated region with response to serotonergic antidepressant treatment (n=1222). Negative decadic logarithm of the uncorrected p-values is plotted against chromosomal location of genotyped (circles) and imputed (squares) SNP markers. The graph covers 500kbp upstream and downstream from the strongest associated genotyped marker (rs10515893). Colouring reflects the linkage disequilibrium (LD) between rs10515893 and other SNP markers, with red meaning strong LD and blue weak LD. The red dotted line is  $p=0.05$ , the blue dotted line is  $p=5*10^{-6}$  and the green dotted line is  $p=5*10^{-8}$ .

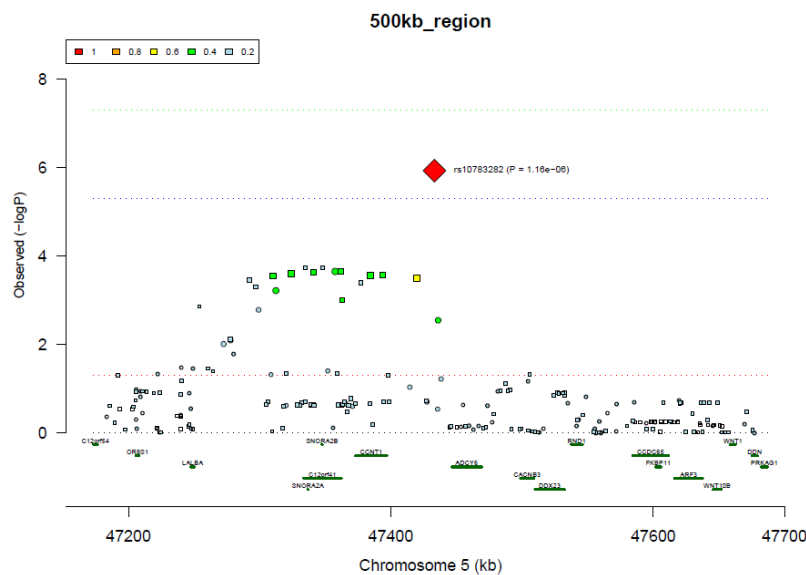

**Figure 21:** Chromosome 12 associated region with response to serotonergic antidepressant treatment (n=1222). Negative decadic logarithm of the uncorrected p-values is plotted against chromosomal location of genotyped (circles) and imputed (squares) SNP markers. The graph covers 500kbp upstream and downstream from the strongest associated genotyped marker (rs10515893). Colouring reflects the linkage disequilibrium (LD) between rs10515893 and other SNP markers, with red meaning strong LD and blue weak LD. The red dotted line is  $p=0.05$ , the blue dotted line is  $p=5*10^{-6}$  and the green dotted line is  $p=5*10^{-8}$ .



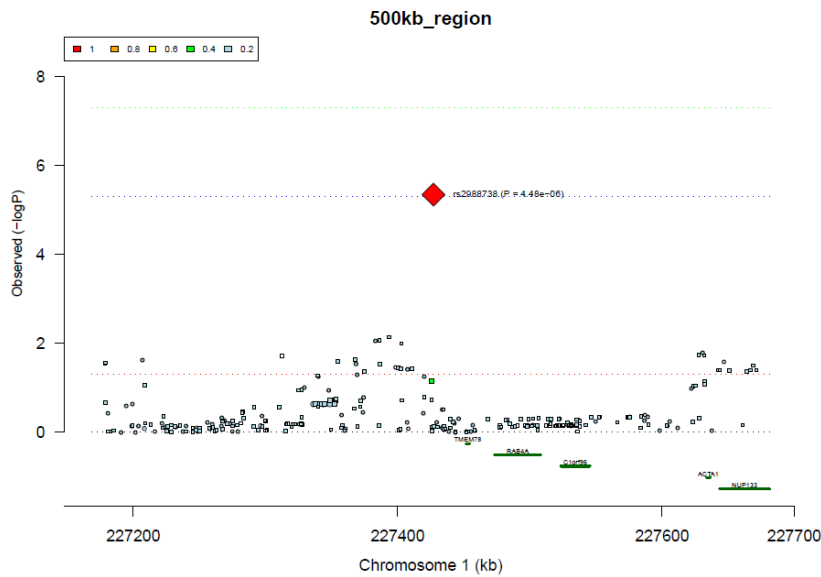

**Figure 22:** Chromosome 1 associated region with response to noradrenergic antidepressant treatment (n=568). Negative decadic logarithm of the uncorrected p-values is plotted against chromosomal location of genotyped (circles) and imputed (squares) SNP markers. The graph covers 500kbp upstream and downstream from the strongest associated imputed marker (rs2988738). Colouring reflects the linkage disequilibrium (LD) between rs2988738 and other SNP markers, with red meaning strong LD and blue weak LD. The red dotted line is  $p=0.05$ , the blue dotted line is  $p=5 \times 10^{-6}$  and the green dotted line is  $p=5 \times 10^{-8}$ .

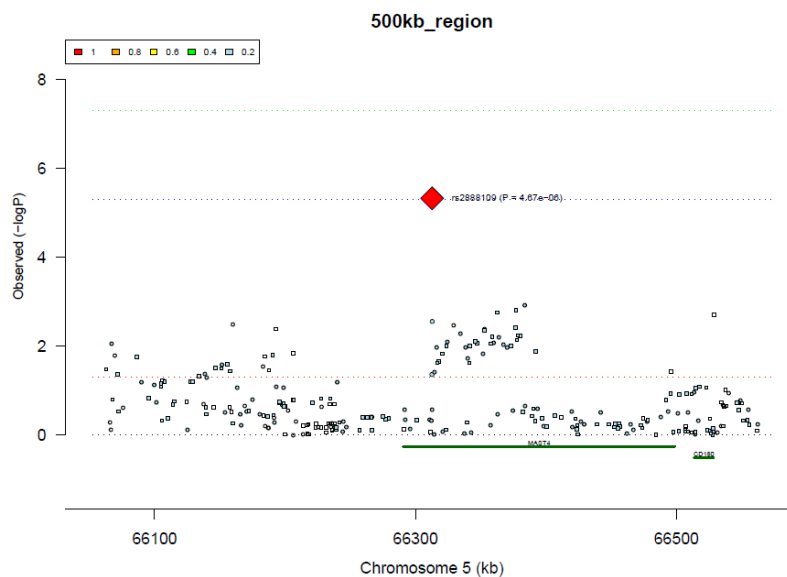

**Figure 23:** Chromosome 5 associated region with response to noradrenergic antidepressant treatment (n=568). Negative decadic logarithm of the uncorrected p-values is plotted against chromosomal location of genotyped (circles) and imputed (squares) SNP markers. The graph covers 500kbp upstream and downstream from the strongest associated imputed marker (rs2888109). Colouring reflects the linkage disequilibrium (LD) between rs2888109 and other SNP markers, with red meaning strong LD and blue weak LD. The red dotted line is  $p=0.05$ , the blue dotted line is  $p=5 \times 10^{-6}$  and the green dotted line is  $p=5 \times 10^{-8}$ .

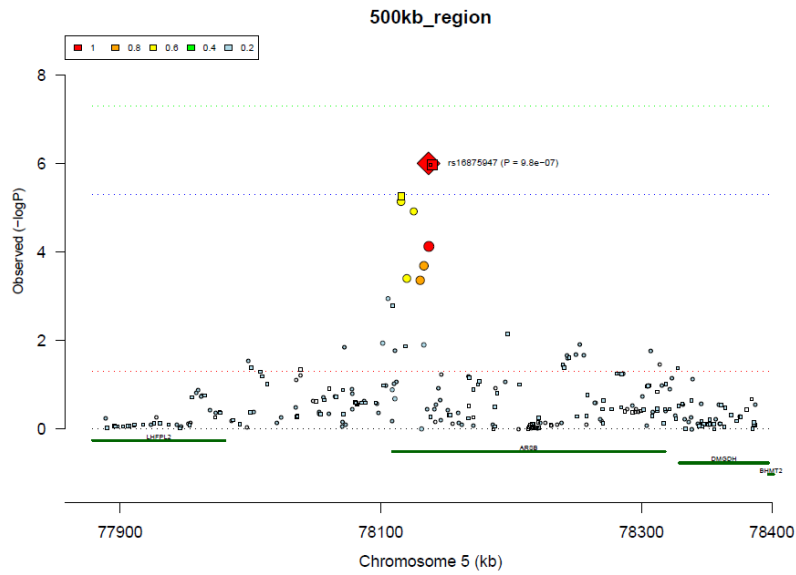

**Figure 24:** Chromosome 5 associated region with response to noradrenergic antidepressant treatment (n=568). Negative decadic logarithm of the uncorrected p-values is plotted against chromosomal location of genotyped (circles) and imputed (squares) SNP markers. The graph covers 500kbp upstream and downstream from the strongest associated imputed marker (rs16876279). Colouring reflects the linkage disequilibrium (LD) between rs16876279 and other SNP markers, with red meaning strong LD and blue weak LD. The red dotted line is  $p=0.05$ , the blue dotted line is  $p=5*10^{-6}$  and the green dotted line is  $p=5*10^{-8}$ .

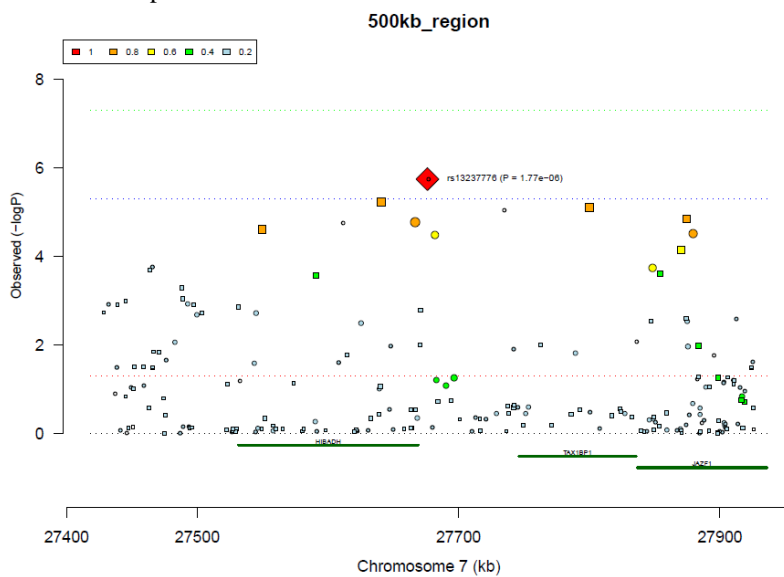

**Figure 25:** Chromosome 7 associated region with response to noradrenergic antidepressant treatment (n=568). Negative decadic logarithm of the uncorrected p-values is plotted against chromosomal location of genotyped (circles) and imputed (squares) SNP markers. The graph covers 500kbp upstream and downstream from the strongest associated genotyped marker (rs13237776). Colouring reflects the linkage disequilibrium (LD) between rs13237776 and other SNP markers, with red meaning strong LD and blue weak LD. The red dotted line is  $p=0.05$ , the blue dotted line is  $p=5*10^{-6}$  and the green dotted line is  $p=5*10^{-8}$ .

## 9 References:

1. Uher R, Huezio-Diaz P, Perroud N, Smith R, Rietschel M, et al. (2009) Genetic predictors of response to antidepressants in the GENDEP project. *Pharmacogenomics J* 9: 225-233.
2. Wing JK, Sartorius N, Ustin TB (1998) *Diagnosis and Clinical Measurement in Psychiatry: A Reference Manual for SCAN*. . Geneva: World Health Organization.
3. Uher R, Farmer A, Maier W, Rietschel M, Hauser J, et al. (2008) Measuring depression: comparison and integration of three scales in the GENDEP study. *Psychol Med* 38: 289-300.
4. Sanchez C, Bergqvist PB, Brennum LT, Gupta S, Hogg S, et al. (2003) Escitalopram, the S-(+)-enantiomer of citalopram, is a selective serotonin reuptake inhibitor with potent effects in animal models predictive of antidepressant and anxiolytic activities. *Psychopharmacology (Berl)* 167: 353-362.
5. Sanchez C, Hyttel J (1999) Comparison of the effects of antidepressants and their metabolites on reuptake of biogenic amines and on receptor binding. *Cell Mol Neurobiol* 19: 467-489.
6. Thomas L, Mulligan J, Mason V, Tallon D, Wiles N, et al. (2008) GENetic and clinical predictors of treatment response in depression: the GenPod randomised trial protocol. *Trials* 9: 29.
7. Lewis G, Pelosi AJ, Araya R, Dunn G (1992) Measuring psychiatric disorder in the community: a standardized assessment for use by lay interviewers. *Psychol Med* 22: 465-486.
8. Beck AT, Ward CH, Mendelson M, Mock J, Erbaugh J (1961) An inventory for measuring depression. *Arch Gen Psychiatry* 4: 561-571.
9. Bondolfi G, Aubry JM, Golaz J, Gex-Fabry M, Gervasoni N, et al. (2006) A stepwise drug treatment algorithm to obtain complete remission in depression: a Geneva study. *Swiss Med Wkly* 136: 78-85.
10. Perroud N, Bondolfi G, Uher R, Gex-Fabry M, Aubry JM, et al. (2011) Clinical and genetic correlates of suicidal ideation during antidepressant treatment in a depressed outpatient sample. *Pharmacogenomics* 12: 365-377.
11. Sheehan G (1998) Comment: how well does a concept travel? *Aust N Z J Psychiatry* 32: 398-399.
12. Clayton AH, Croft HA, Horrigan JP, Wightman DS, Krishen A, et al. (2006) Bupropion extended release compared with escitalopram: effects on sexual functioning and antidepressant efficacy in 2 randomized, double-blind, placebo-controlled studies. *J Clin Psychiatry* 67: 736-746.
13. Purcell S, Neale B, Todd-Brown K, Thomas L, Ferreira MA, et al. (2007) PLINK: a tool set for whole-genome association and population-based linkage analyses. *Am J Hum Genet* 81: 559-575.
14. Wittke-Thompson JK, Pluzhnikov A, Cox NJ (2005) Rational inferences about departures from Hardy-Weinberg equilibrium. *Am J Hum Genet* 76: 967-986.
15. Seldin MF, Shigeta R, Villoslada P, Selmi C, Tuomilehto J, et al. (2006) European population substructure: clustering of northern and southern populations. *PLoS Genet* 2: e143.

16. Price AL, Patterson NJ, Plenge RM, Weinblatt ME, Shadick NA, et al. (2006) Principal components analysis corrects for stratification in genome-wide association studies. *Nat Genet* 38: 904-909.
17. Hamilton M (1960) A rating scale for depression. *J Neurol Neurosurg Psychiatry* 23: 56-62.
18. Montgomery SA, Asberg M (1979) A new depression scale designed to be sensitive to change. *Br J Psychiatry* 134: 382-389.
19. Royston P, Altman DG, Sauerbrei W (2006) Dichotomizing continuous predictors in multiple regression: a bad idea. *Stat Med* 25: 127-141.
20. Streiner DL (2002) Breaking up is hard to do: the heartbreak of dichotomizing continuous data. *Can J Psychiatry* 47: 262-266.
21. Uher R, Muthen B, Souery D, Mors O, Jaracz J, et al. (2010) Trajectories of change in depression severity during treatment with antidepressants. *Psychol Med* 40: 1367-1377.
22. Uher R, Perroud N, Ng MY, Hauser J, Henigsberg N, et al. (2010) Genome-wide pharmacogenetics of antidepressant response in the GENDEP project. *Am J Psychiatry* 167: 555-564.
23. Uher R, Maier W, Hauser J, Marusic A, Schmael C, et al. (2009) Differential efficacy of escitalopram and nortriptyline on dimensional measures of depression. *Br J Psychiatry* 194: 252-259.
24. Leucht S, Kane JM, Etschel E, Kissling W, Hamann J, et al. (2006) Linking the PANSS, BPRS, and CGI: clinical implications. *Neuropsychopharmacology* 31: 2318-2325.
25. Lane P (2008) Handling drop-out in longitudinal clinical trials: a comparison of the LOCF and MMRM approaches. *Pharm Stat* 7: 93-106.
26. Mallinckrodt CH, Clark WS, David SR (2001) Accounting for dropout bias using mixed-effects models. *J Biopharm Stat* 11: 9-21.
27. Uher R, Tansey KE, Malki K, Perlis RH (2012) Biomarkers predicting treatment outcome in depression: what is clinically significant? *Pharmacogenomics* 13: 233-240.
28. Excellence NIfC (2004) *Depression: Management of Depression in Primary and Secondary Care*. London.
29. Purcell S, Cherny SS, Sham PC (2003) Genetic Power Calculator: design of linkage and association genetic mapping studies of complex traits. *Bioinformatics* 19: 149-150.
30. Lin DY, Zeng D (2010) Meta-analysis of genome-wide association studies: no efficiency gain in using individual participant data. *Genet Epidemiol* 34: 60-66.
31. Spencer CC, Su Z, Donnelly P, Marchini J (2009) Designing genome-wide association studies: sample size, power, imputation, and the choice of genotyping chip. *PLoS Genet* 5: e1000477.
32. Hellquist A, Zucchelli M, Lindgren CM, Saarialho-Kere U, Jarvinen TM, et al. (2009) Identification of MAMDC1 as a candidate susceptibility gene for systemic lupus erythematosus (SLE). *PLoS One* 4: e8037.
33. Heck A, Pfister H, Czamara D, Muller-Myhsok B, Putz B, et al. Evidence for associations between MDGA2 polymorphisms and harm avoidance: replication and extension of a genome-wide association finding. *Psychiatr Genet* 21: 257-260.

34. Hetteema JM, van den Oord EJ, An SS, Kendler KS, Chen X (2009) Follow-up association study of novel neuroticism gene MAMDC1. *Psychiatr Genet* 19: 213-214.
35. van den Oord EJ, Kuo PH, Hartmann AM, Webb BT, Moller HJ, et al. (2008) Genomewide association analysis followed by a replication study implicates a novel candidate gene for neuroticism. *Arch Gen Psychiatry* 65: 1062-1071.
36. Kendler KS, Gatz M, Gardner CO, Pedersen NL (2006) Personality and major depression: a Swedish longitudinal, population-based twin study. *Arch Gen Psychiatry* 63: 1113-1120.
37. Kendler KS, Myers J (2010) The genetic and environmental relationship between major depression and the five-factor model of personality. *Psychol Med* 40: 801-806.
38. Xu S, Witmer PD, Lumayag S, Kovacs B, Valle D (2007) MicroRNA (miRNA) transcriptome of mouse retina and identification of a sensory organ-specific miRNA cluster. *J Biol Chem* 282: 25053-25066.
39. Saus E, Soria V, Escaramis G, Vivarelli F, Crespo JM, et al. (2010) Genetic variants and abnormal processing of pre-miR-182, a circadian clock modulator, in major depression patients with late insomnia. *Hum Mol Genet* 19: 4017-4025.
40. Wray NR, Pergadia ML, Blackwood DH, Penninx BW, Gordon SD, et al. (2010) Genome-wide association study of major depressive disorder: new results, meta-analysis, and lessons learned. *Mol Psychiatry*.
41. Hines LM, Tabakoff B (2005) Platelet adenylyl cyclase activity: a biological marker for major depression and recent drug use. *Biol Psychiatry* 58: 955-962.
42. Bevitt DJ, Li Z, Lindrop JL, Barker MD, Clarke MP, et al. (2005) Analysis of full length ADAMTS6 transcript reveals alternative splicing and a role for the 5' untranslated region in translational control. *Gene* 359: 99-110.
43. Angata K, Suzuki M, McAuliffe J, Ding Y, Hindsgaul O, et al. (2000) Differential biosynthesis of polysialic acid on neural cell adhesion molecule (NCAM) and oligosaccharide acceptors by three distinct alpha 2,8-sialyltransferases, ST8Sia IV (PST), ST8Sia II (STX), and ST8Sia III. *J Biol Chem* 275: 18594-18601.
44. Aonurm-Helm A, Jurgenson M, Zharkovsky T, Sonn K, Berezin V, et al. (2008) Depression-like behaviour in neural cell adhesion molecule (NCAM)-deficient mice and its reversal by an NCAM-derived peptide, FGL. *Eur J Neurosci* 28: 1618-1628.
45. Beecken WD, Engl T, Ogbomo H, Relja B, Cinatl J, et al. (2005) Valproic acid modulates NCAM polysialylation and polysialyltransferase mRNA expression in human tumor cells. *Int Immunopharmacol* 5: 757-769.
46. Holmans P, Weissman MM, Zubenko GS, Scheftner WA, Crowe RR, et al. (2007) Genetics of recurrent early-onset major depression (GenRED): final genome scan report. *Am J Psychiatry* 164: 248-258.
47. Lee MT, Chen CH, Lee CS, Chen CC, Chong MY, et al. (2010) Genome-wide association study of bipolar I disorder in the Han Chinese population. *Mol Psychiatry*.
48. Arai M, Yamada K, Toyota T, Obata N, Haga S, et al. (2006) Association between polymorphisms in the promoter region of the sialyltransferase 8B (SIAT8B) gene and schizophrenia. *Biol Psychiatry* 59: 652-659.
49. Tao R, Li C, Zheng Y, Qin W, Zhang J, et al. (2007) Positive association between SIAT8B and schizophrenia in the Chinese Han population. *Schizophr Res* 90: 108-114.

50. Ashburner M, Ball CA, Blake JA, Botstein D, Butler H, et al. (2000) Gene ontology: tool for the unification of biology. The Gene Ontology Consortium. *Nat Genet* 25: 25-29.
51. Bult CJ, Eppig JT, Kadin JA, Richardson JE, Blake JA (2008) The Mouse Genome Database (MGD): mouse biology and model systems. *Nucleic Acids Res* 36: D724-728.
52. Mi H, Dong Q, Muruganujan A, Gaudet P, Lewis S, et al. PANTHER version 7: improved phylogenetic trees, orthologs and collaboration with the Gene Ontology Consortium. *Nucleic Acids Res* 38: D204-210.
53. Subramanian A, Tamayo P, Mootha VK, Mukherjee S, Ebert BL, et al. (2005) Gene set enrichment analysis: a knowledge-based approach for interpreting genome-wide expression profiles. *Proc Natl Acad Sci U S A* 102: 15545-15550.
54. Holmans P, Green EK, Pahwa JS, Ferreira MA, Purcell SM, et al. (2009) Gene ontology analysis of GWA study data sets provides insights into the biology of bipolar disorder. *Am J Hum Genet* 85: 13-24.
55. Stergiakouli E, Hamshere M, Holmans P, Langley K, Zaharieva I, et al. Investigating the Contribution of Common Genetic Variants to the Risk and Pathogenesis of ADHD. *Am J Psychiatry*.
56. Sklar P, Ripke S, Scott LJ, Andreassen OA, Cichon S, et al. (2011) Large-scale genome-wide association analysis of bipolar disorder identifies a new susceptibility locus near ODZ4. *Nat Genet* 43: 977-983.
57. Ripke S, Sanders AR, Kendler KS, Levinson DF, Sklar P, et al. (2011) Genome-wide association study identifies five new schizophrenia loci. *Nat Genet* 43: 969-976.
58. Rush AJ, Fava M, Wisniewski SR, Lavori PW, Trivedi MH, et al. (2004) Sequenced treatment alternatives to relieve depression (STAR\*D): rationale and design. *Control Clin Trials* 25: 119-142.
59. Trivedi MH, Rush AJ, Wisniewski SR, Nierenberg AA, Warden D, et al. (2006) Evaluation of outcomes with citalopram for depression using measurement-based care in STAR\*D: implications for clinical practice. *Am J Psychiatry* 163: 28-40.
60. Garriock HA, Kraft JB, Shyn SI, Peters EJ, Yokoyama JS, et al. (2010) A genomewide association study of citalopram response in major depressive disorder. *Biol Psychiatry* 67: 133-138.
61. Wellcome Trust Case Control Consortium (2007) Genome-wide association study of 14,000 cases of seven common diseases and 3,000 shared controls. *Nature* 447: 661-678.
62. Browning SR, Browning BL (2007) Rapid and accurate haplotype phasing and missing-data inference for whole-genome association studies by use of localized haplotype clustering. *Am J Hum Genet* 81: 1084-1097.
63. Purcell SM, Wray NR, Stone JL, Visscher PM, O'Donovan MC, et al. (2009) Common polygenic variation contributes to risk of schizophrenia and bipolar disorder. *Nature* 460: 748-752.
64. Ruderfer DM, Kirov G, Chambert K, Moran JL, Owen MJ, et al. (2011) A family-based study of common polygenic variation and risk of schizophrenia. *Mol Psychiatry* 16: 887-888.
65. Kato M, Serretti A (2010) Review and meta-analysis of antidepressant pharmacogenetic findings in major depressive disorder. *Mol Psychiatry* 15: 473-500.

66. Horstmann S, Binder EB (2009) Pharmacogenomics of antidepressant drugs. *Pharmacol Ther* 124: 57-73.
67. Ising M, Lucae S, Binder EB, Bettecken T, Uhr M, et al. (2009) A genomewide association study points to multiple loci that predict antidepressant drug treatment outcome in depression. *Arch Gen Psychiatry* 66: 966-975.
